# Supplementary material for: Stress response silencing by an E3 ligase mutated in neurodegeneration
Source: PubMed Central journal article supplement (PMC10881396; doi:10.1038/s41586-023-06985-7), 2024-01-31
Supplement: 41586_2023_6985_MOESM1_ESM.pdf [file 41586_2023_6985_MOESM1_ESM.pdf]

---

**Supplementary information**

---

**Stress response silencing by an E3 ligase mutated in neurodegeneration**

---

In the format provided by the  
authors and unedited

**Figure 2d**

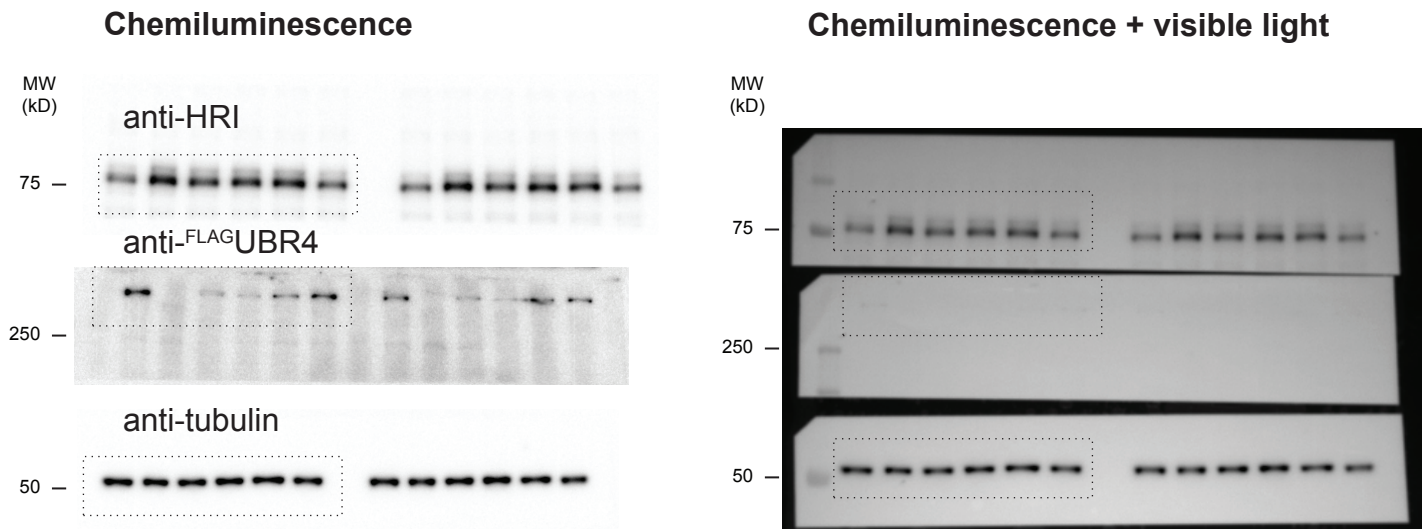

The loading control tubulin was run on the same gel as <sup>FLAG</sup>UBR4 and HRI.

**Figure 2e**

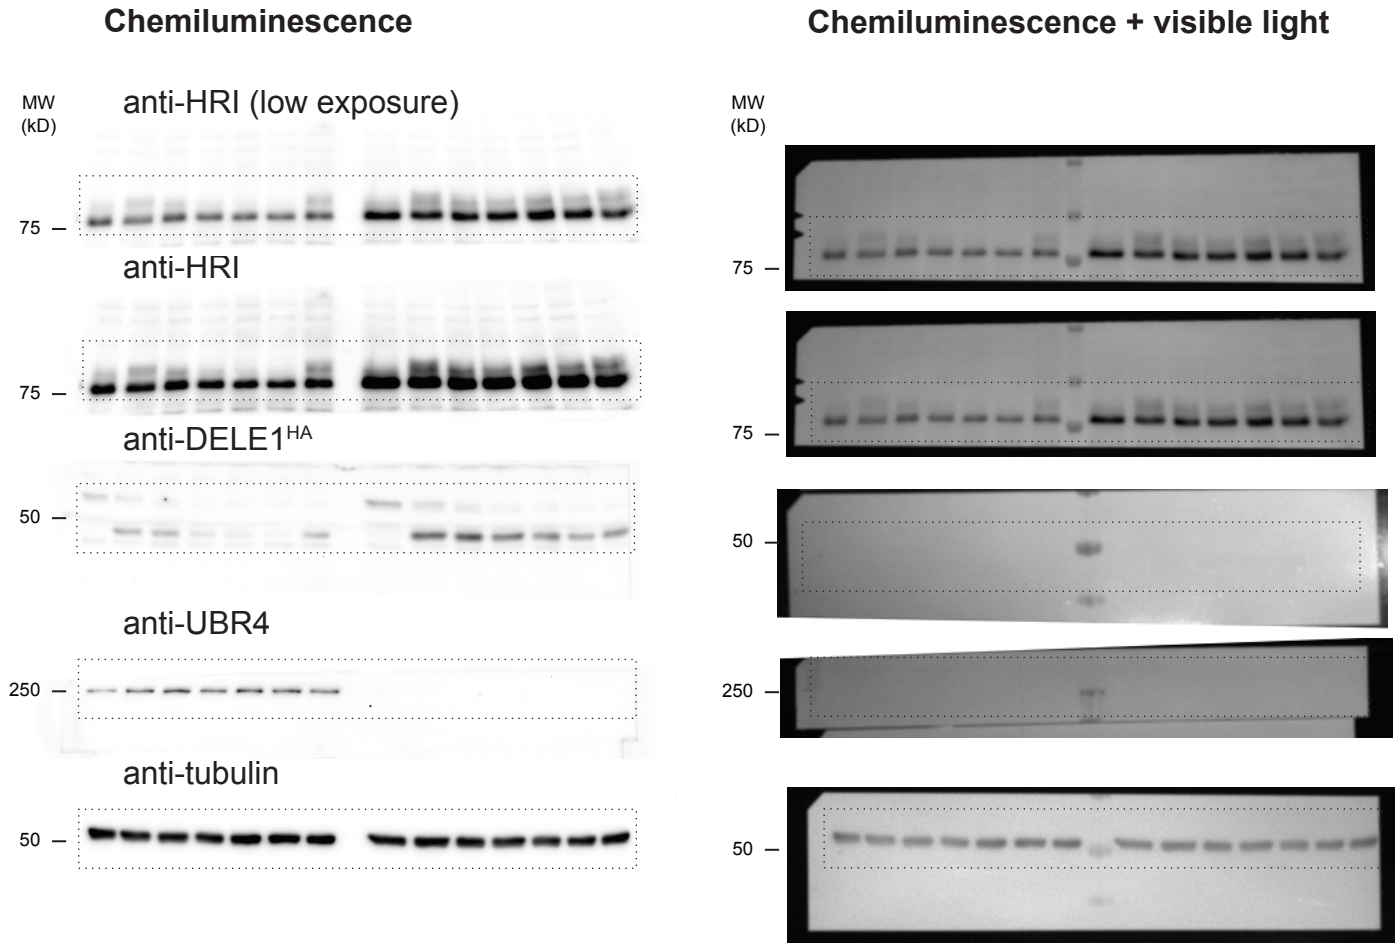

The loading control tubulin was obtained by stripping the DELE1<sup>HA</sup> membrane, which was run on the same gel as UBR4.

**Figure 2f**

Raw files

HRI-sumo autoradiography

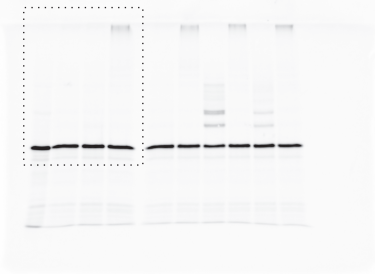

Contrasted raw files to discern typically low  $S^{35}$  autoradiography signal

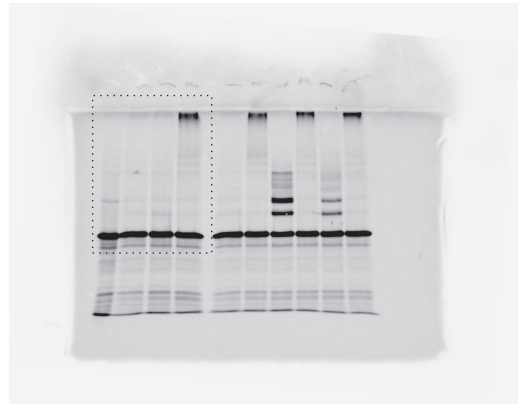

DELE1-sumo autoradiography

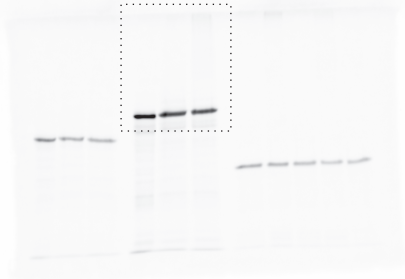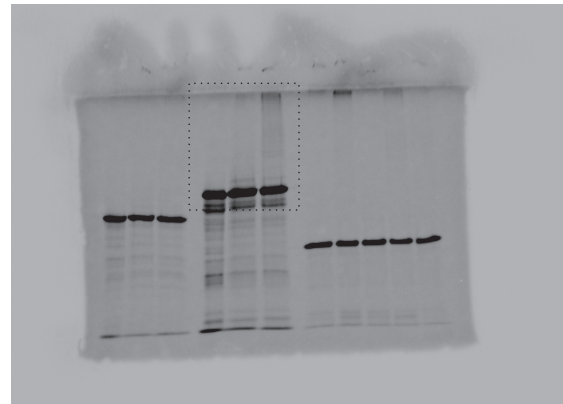

**Figure 2g**

HRI-sumo autoradiography

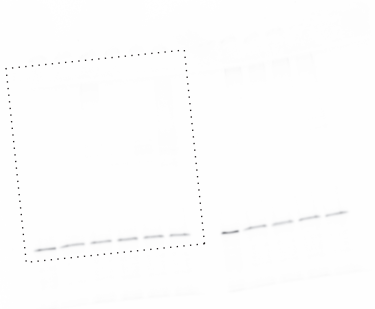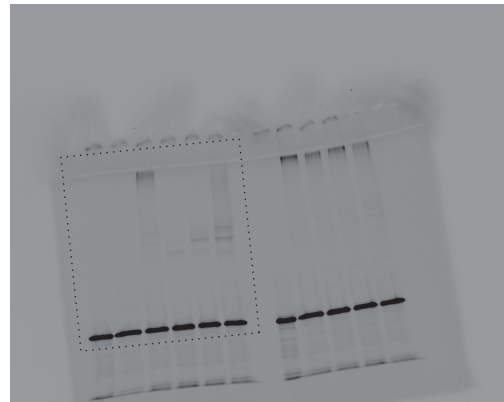

**Figure 2h**

HRI-sumo autoradiography

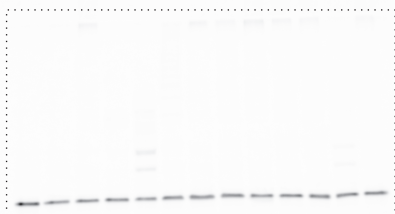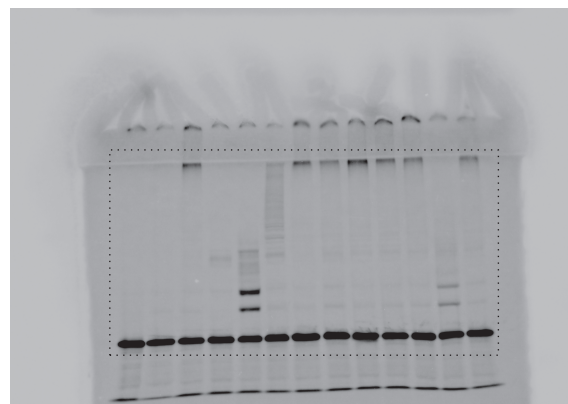

**Figure 3b**

**Chemiluminescence**

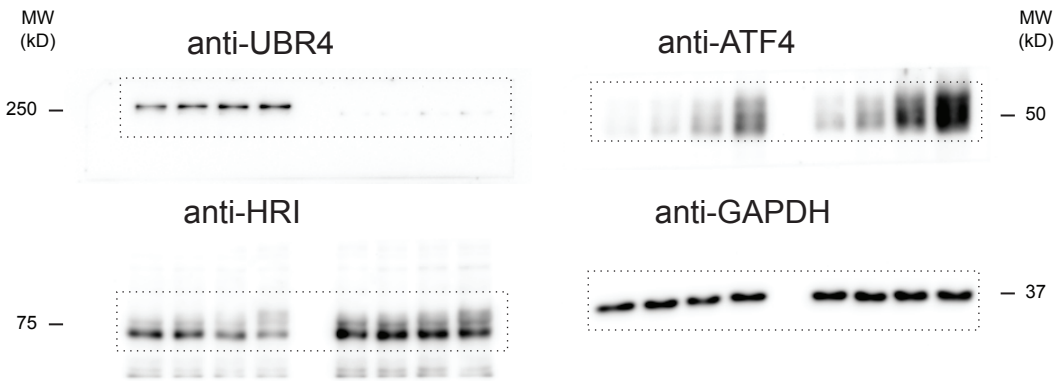

**Chemiluminescence + visible light**

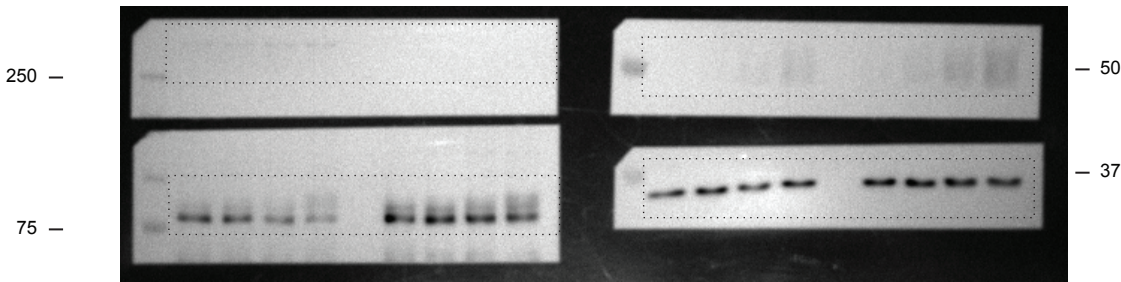

The loading control GAPDH was run on the same gel as UBR4, HRI and ATF4.

**Figure 3c**

**Chemiluminescence**

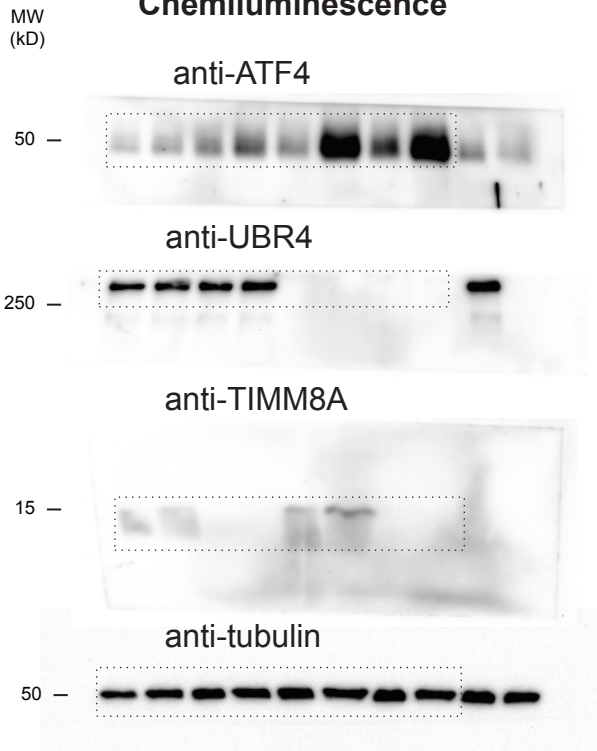

**Chemiluminescence + visible light**

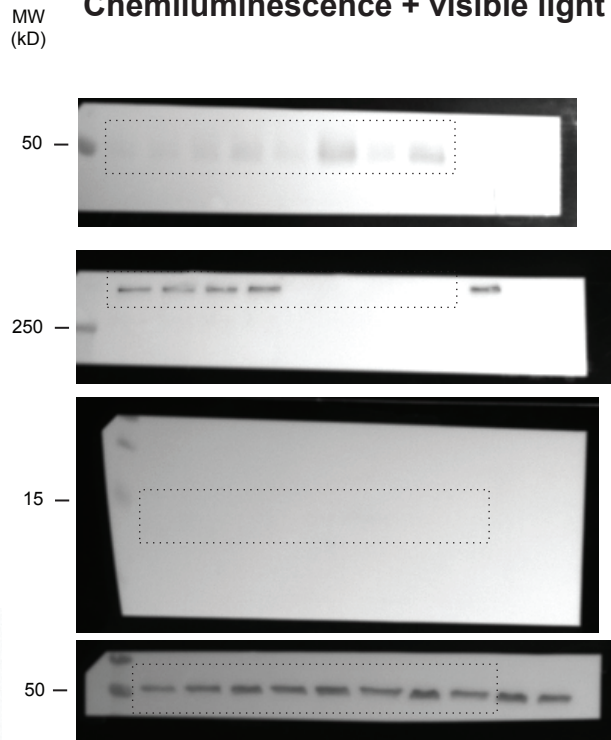

The loading control tubulin was run on the same gel as TIMM8A.

**Figure 3f**

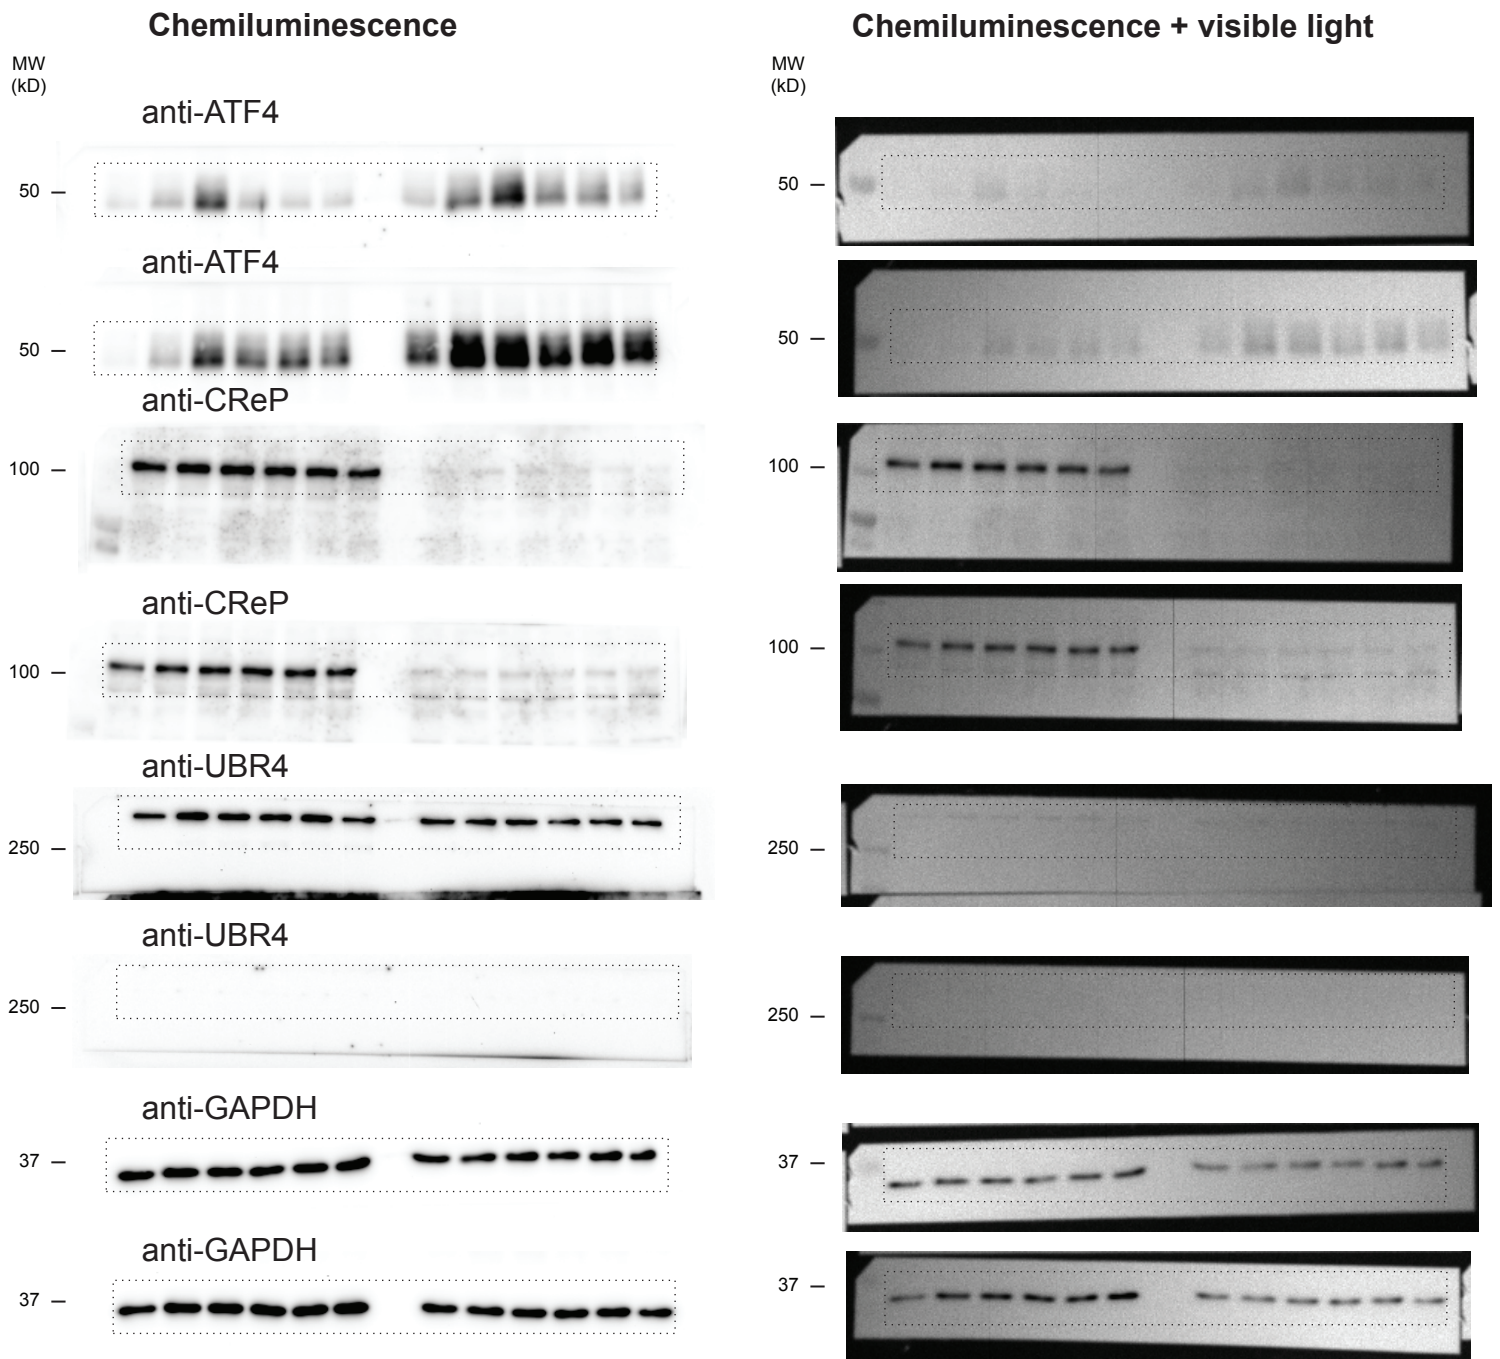

The loading controls GAPDH were run on the same gels as ATF4, CReP and UBR4 in wt and  $\Delta UBR4$  respectively.

**Figure 4d**

Raw file  
HRI-sumo autoradiography

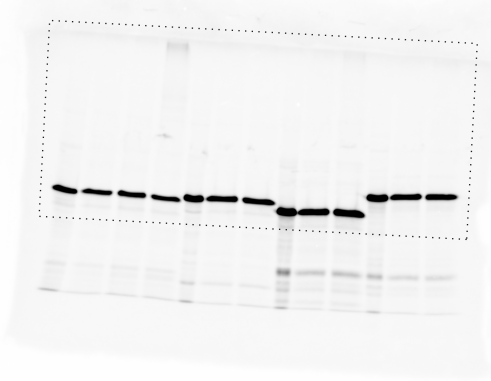

Contrasted raw files to discern typically low  $S^{35}$  autoradiography signal

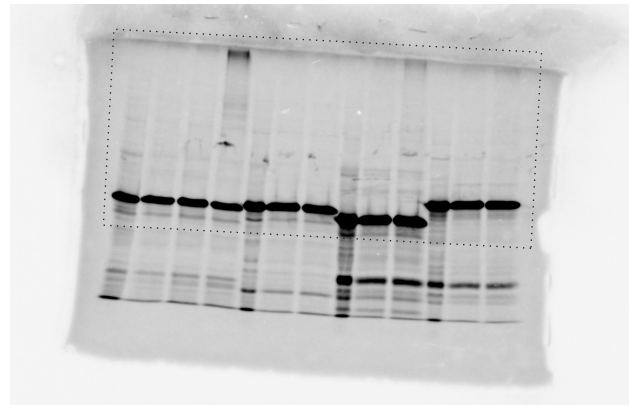

**Figure 4e**

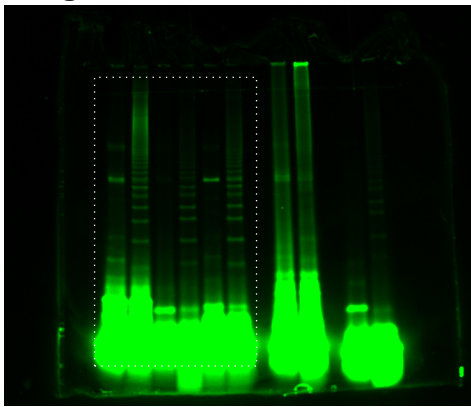

**Figure 4g**

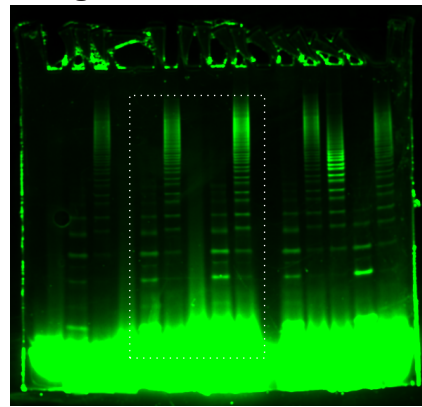

**Figure 4h**

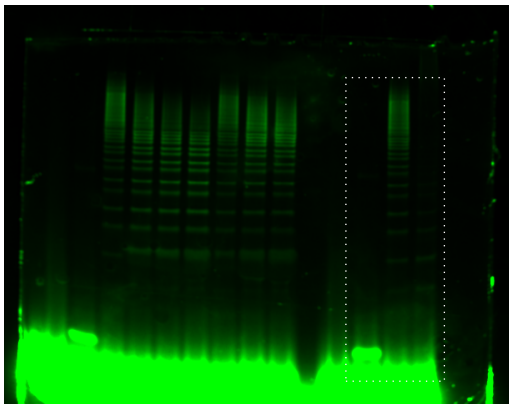

**Figure 4i**

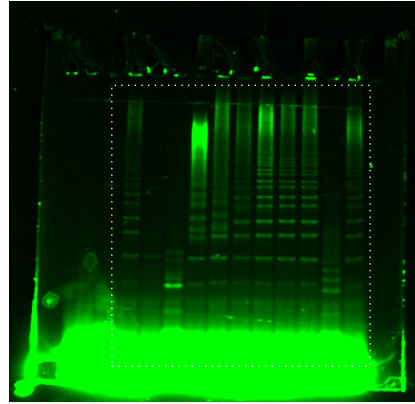

**Figure 5d**

Raw file  
HRI-sumo autoradiography

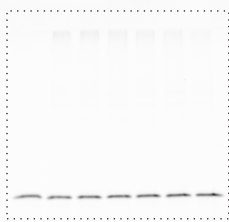

Contrasted raw files to discern typically low  $S^{35}$  autoradiography signal

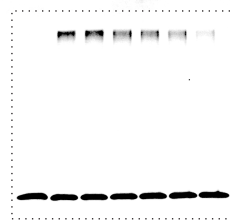

# Extended Data Figure 1a

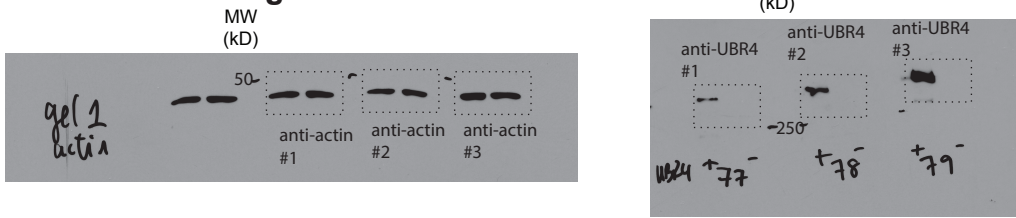

The loading control actin was blotted from the same gel as UBR4 samples.

## Extended Data Figure 2a

### Chemiluminescence

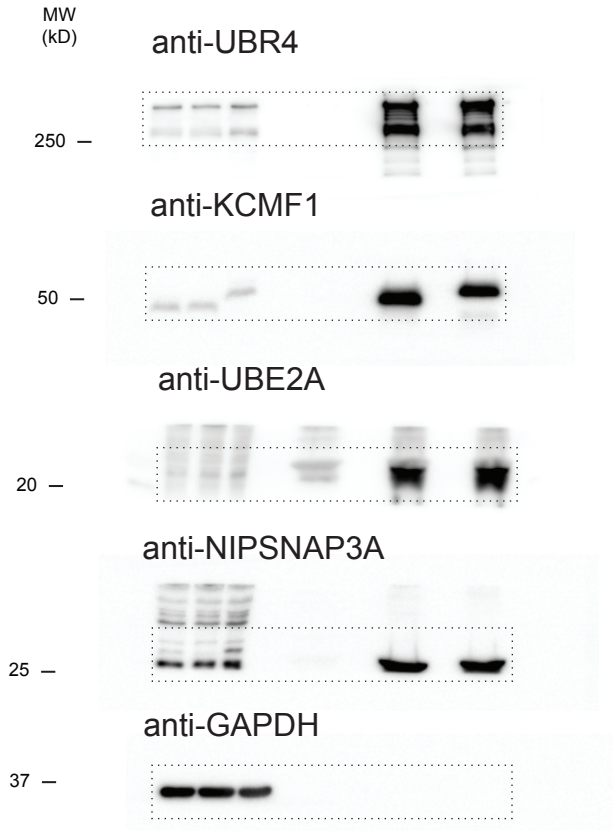

### Chemiluminescence + visible light

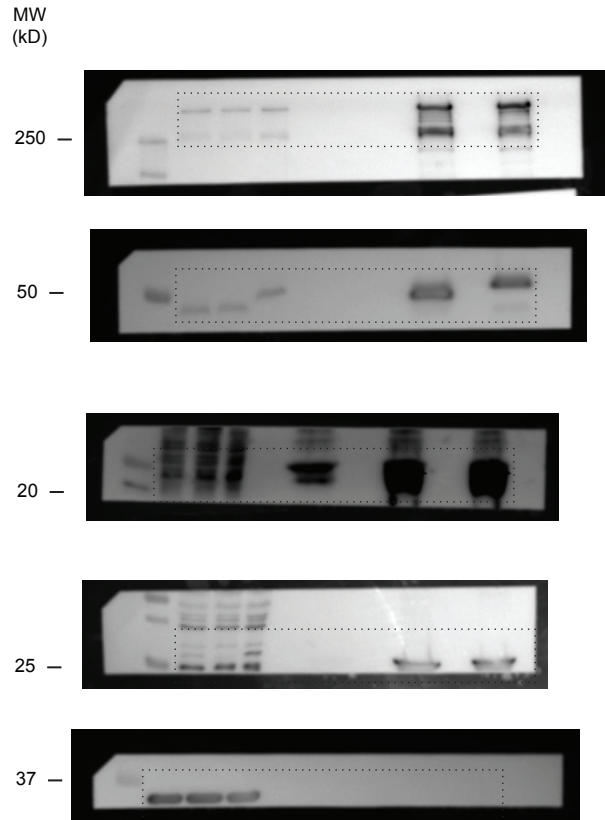

The loading control GAPDH was run on the same gel as UBR4 and KCMF1.

### Chemiluminescence

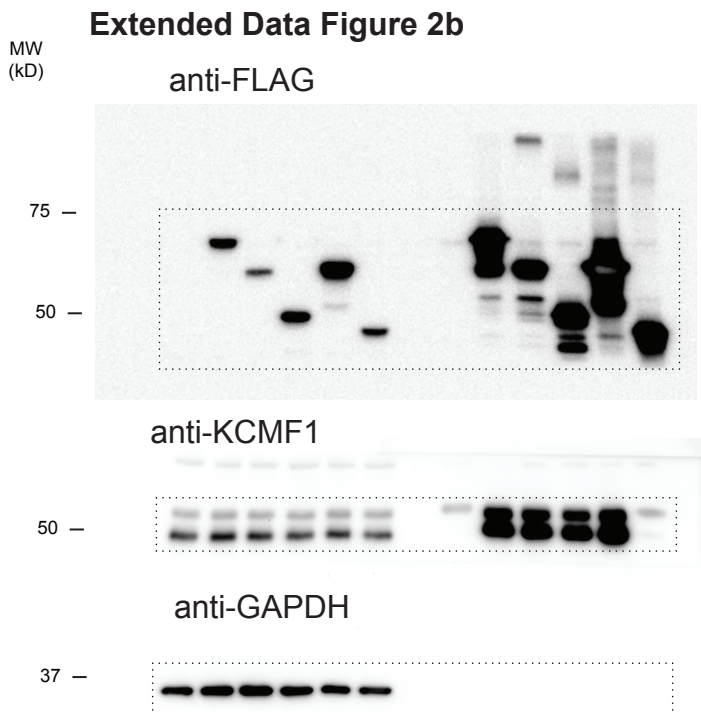

### Chemiluminescence + visible light

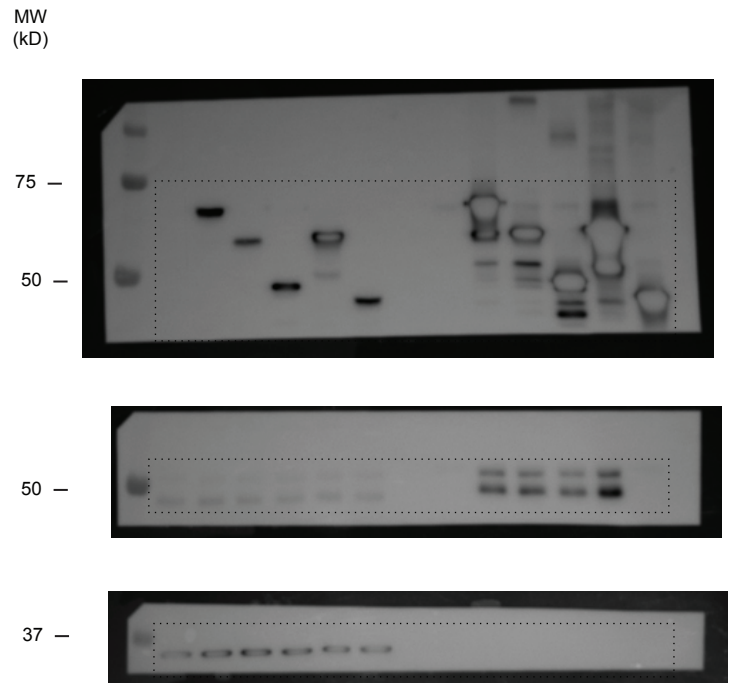

The loading control GAPDH was run on the same gel as KCMF1.



## Extended Data Figure 2c

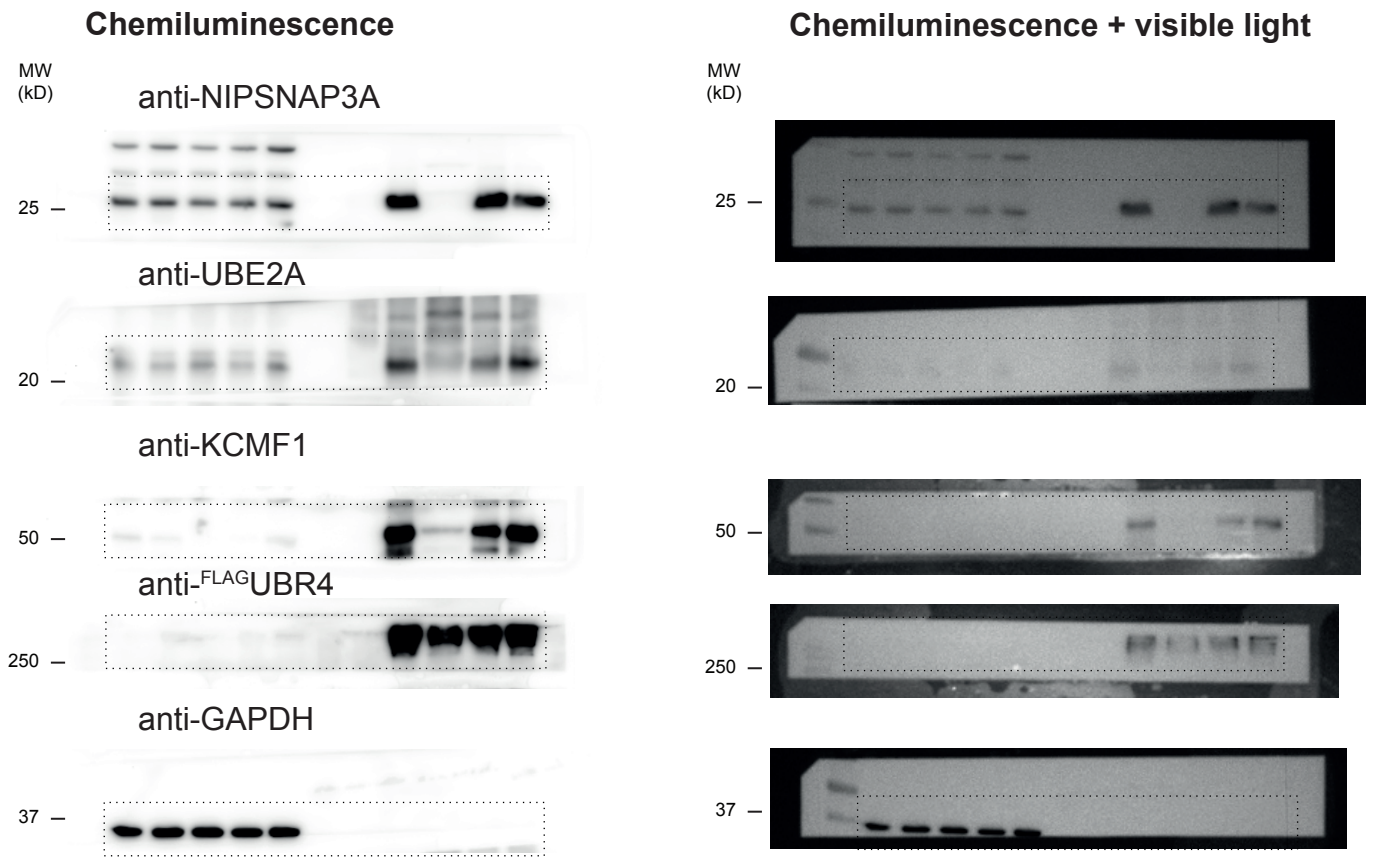

The loading control GAPDH was run on the same gel as UBE2A and <sup>FLAG</sup>UBR4.

### Extended Data Figure 4a

Raw files  
HRI-sumo/MBP-sumo  
autoradiography

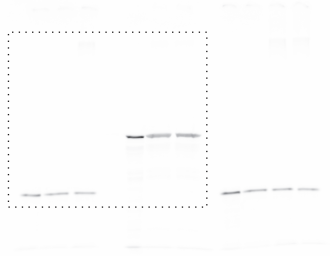

Contrasted raw files to discern typically low  $S^{35}$  autoradiography signal

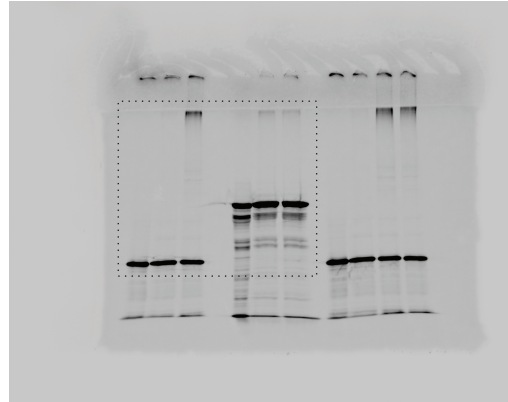

### Extended Data Figure 4b

HRI-sumo autoradiography

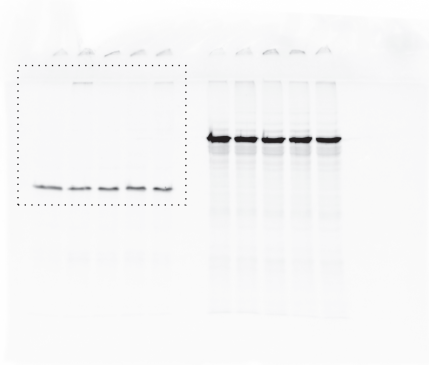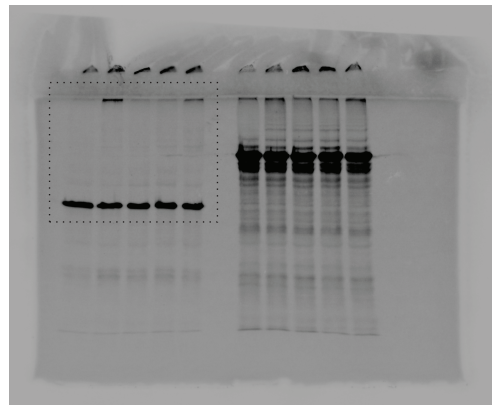

### Extended Data Figure 4c

Chemiluminescence

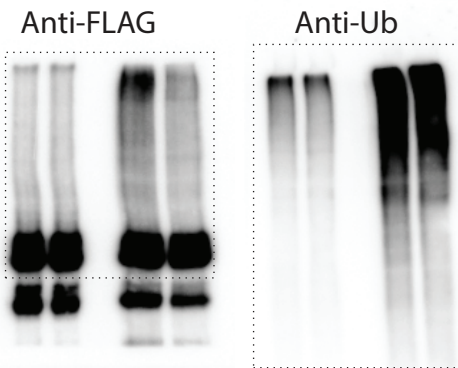

Chemiluminescence

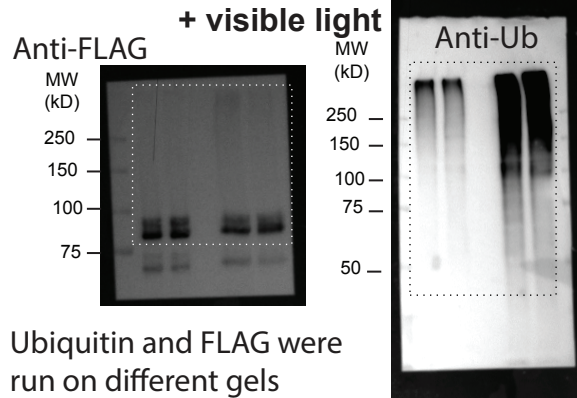

Ubiquitin and FLAG were run on different gels

### Extended Data Figure 4d

Raw file  
HRI-sumo autoradiography

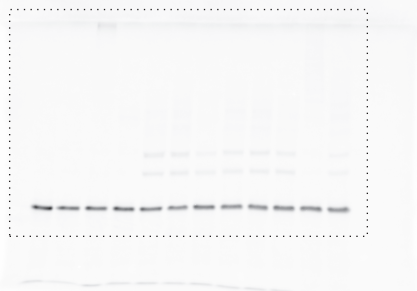

Contrasted raw file to discern typically low  $S^{35}$  autoradiography signal

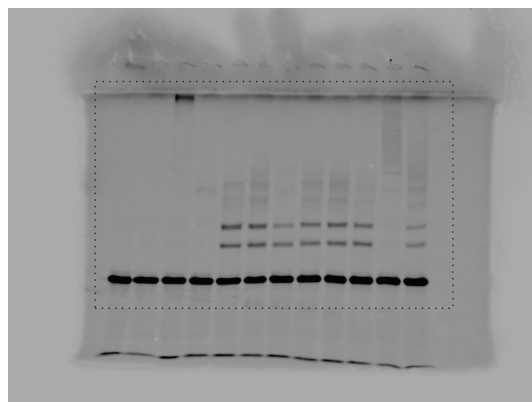

## Extended Data Figure 5b

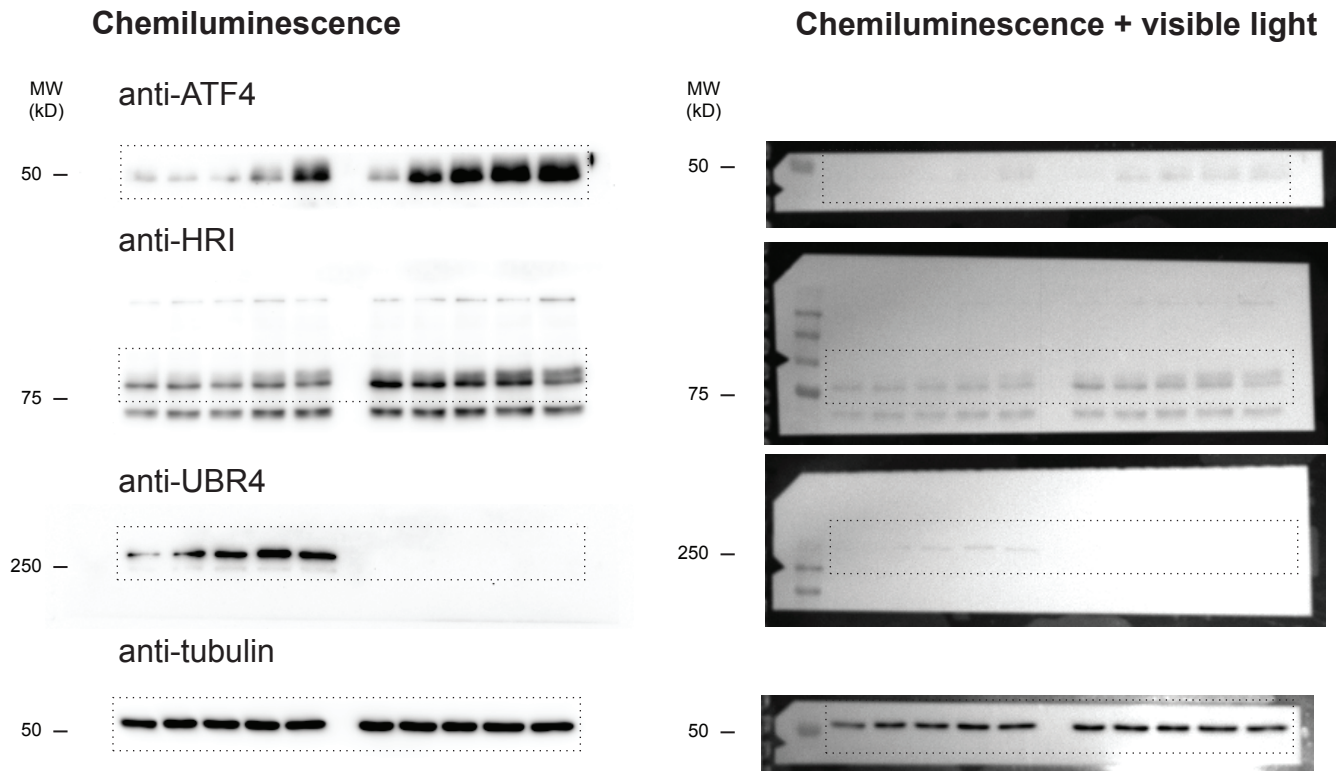

The loading control tubulin was run on the same gel as UBR4 .

## Extended Data Figure 5c

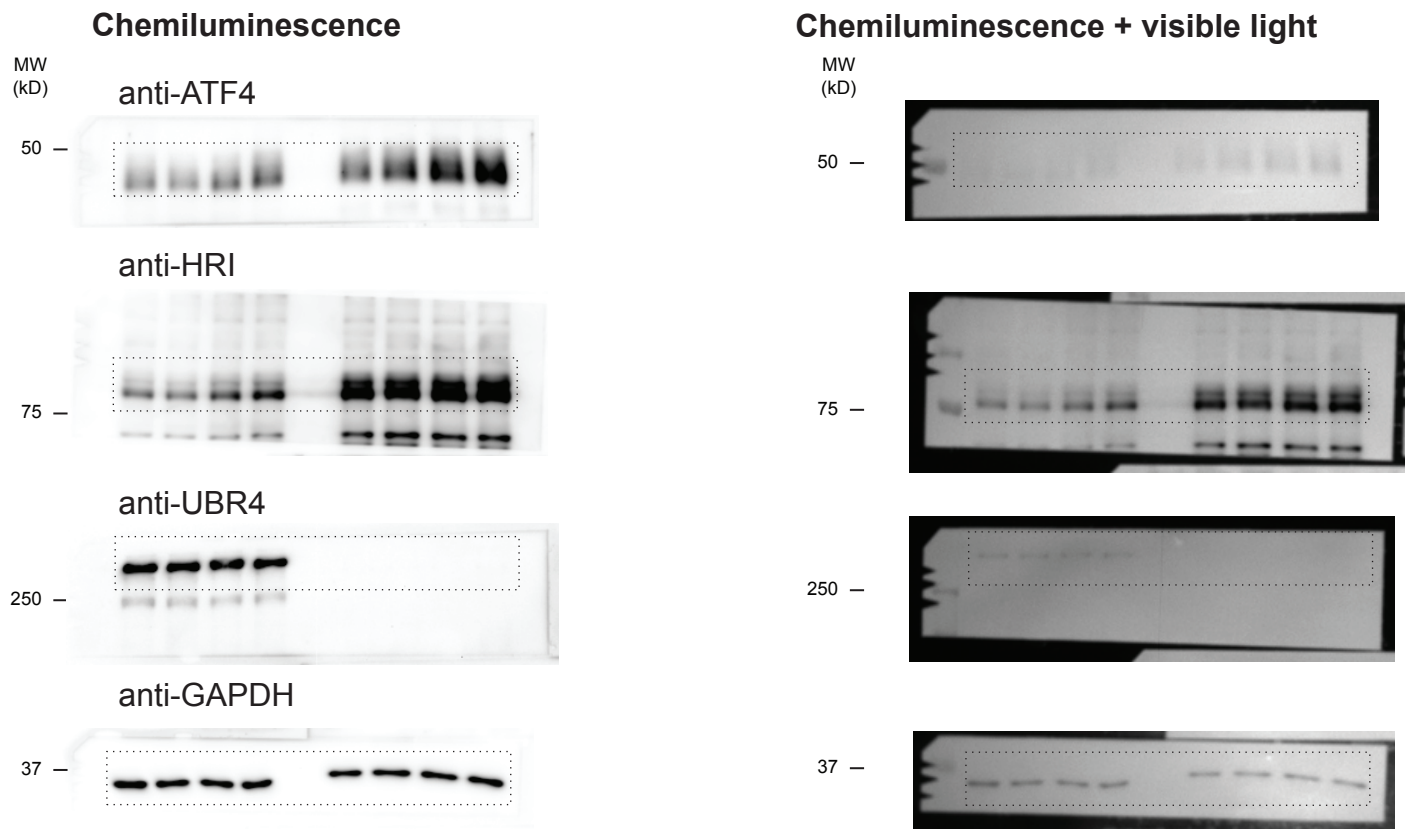

The loading control GAPDH was run on the same gel as ATF4, HRI and UBR4.

### Extended Data Figure 5d

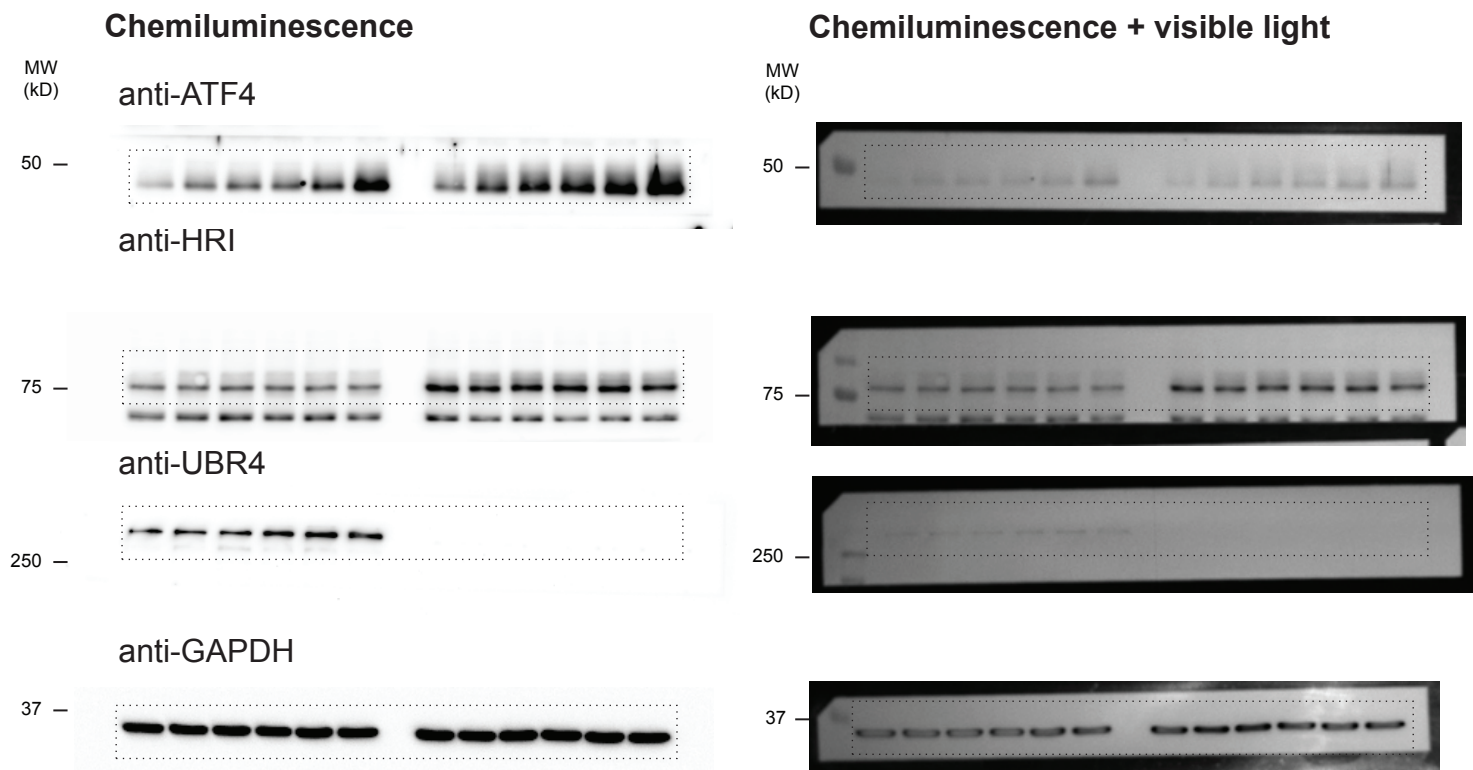

The loading control GAPDH was run on the same gel as ATF4, HRI and UBR4.

### Extended Data Figure 5e

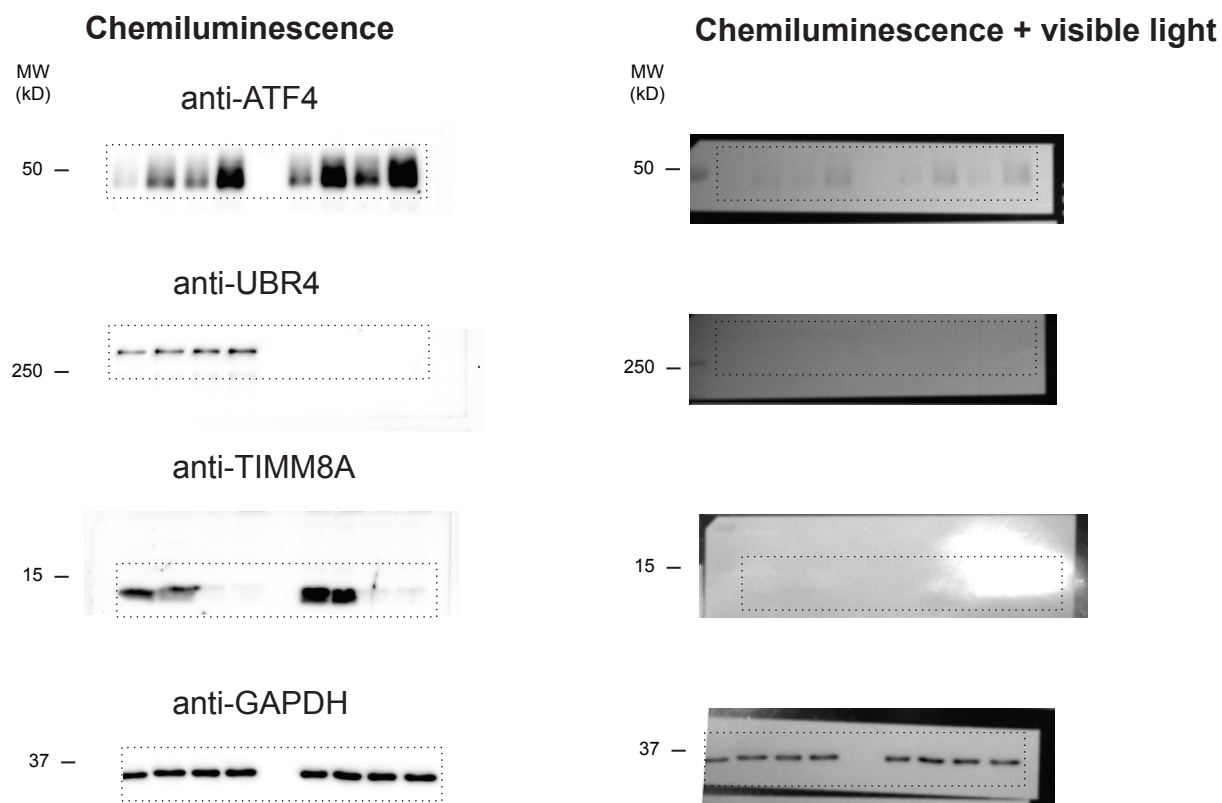

The loading control GAPDH was run on the same gel as ATF4 and UBR4.

### Extended Data Figure 5h

#### Chemiluminescence

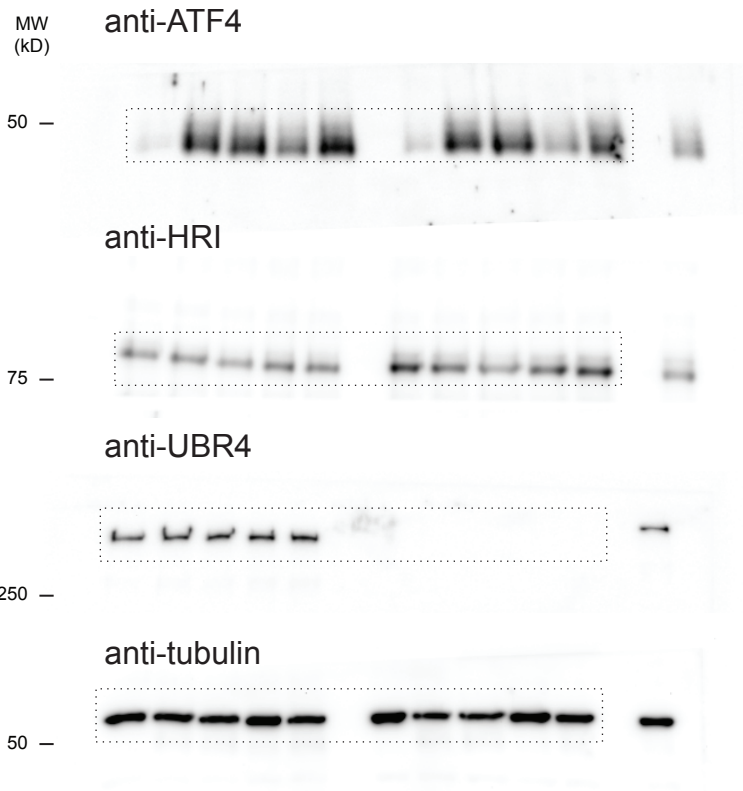

#### Chemiluminescence + visible light

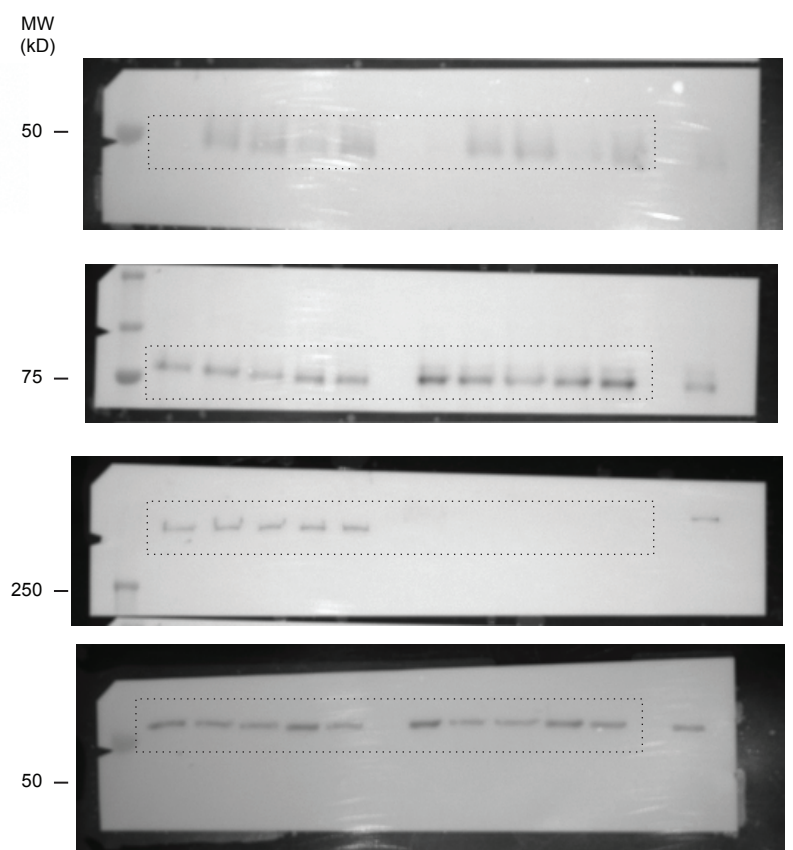

The loading control tubulin was obtained by stripping the ATF4 membrane, which was run on the same gel as HRI and UBR4.

### Extended Data Figure 5i

#### Chemiluminescence

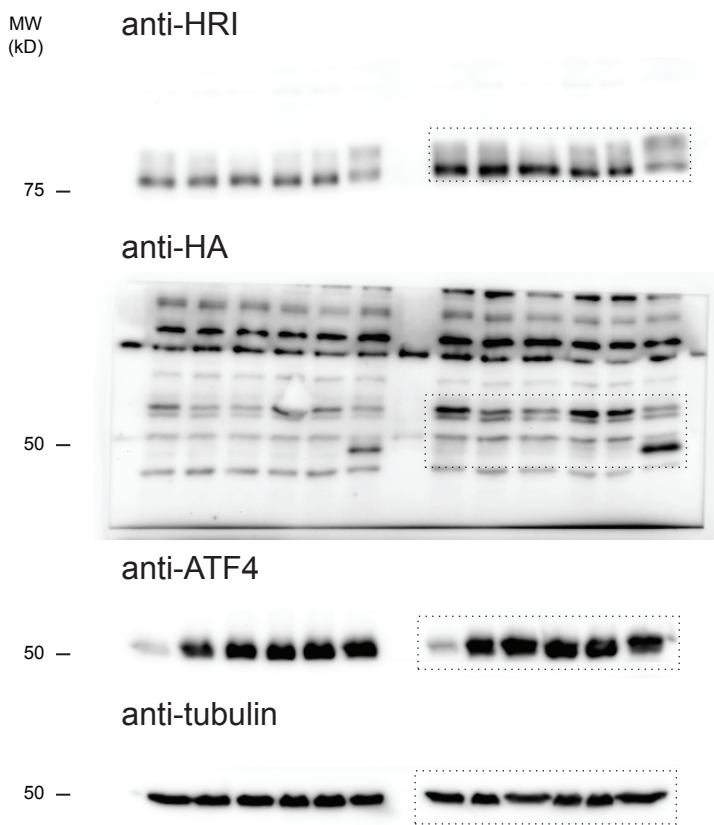

#### Chemiluminescence + visible light

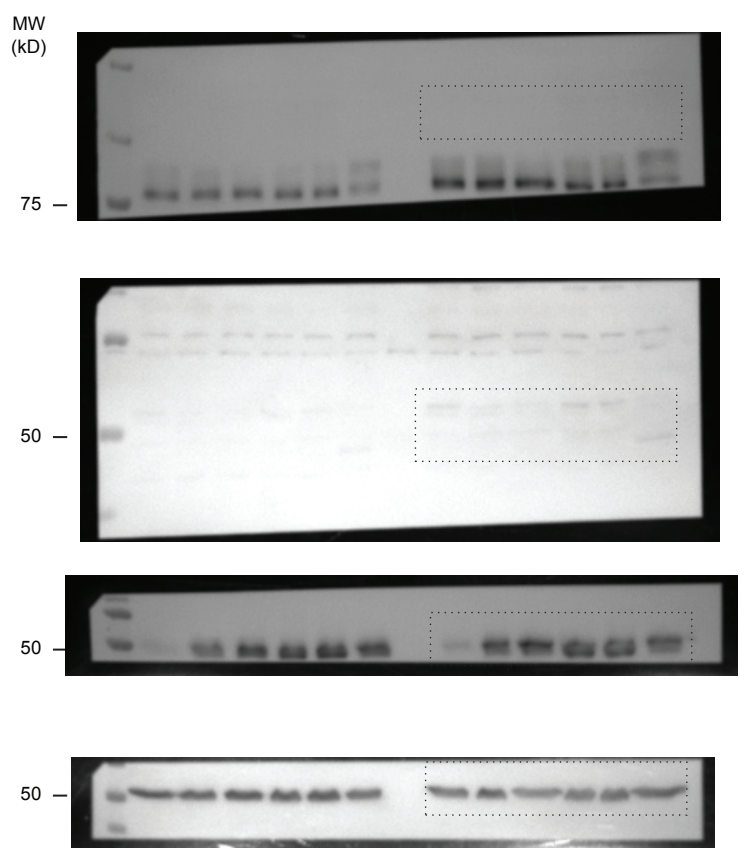

The loading control tubulin was run on a separate gel.

### Extended Data Figure 6a

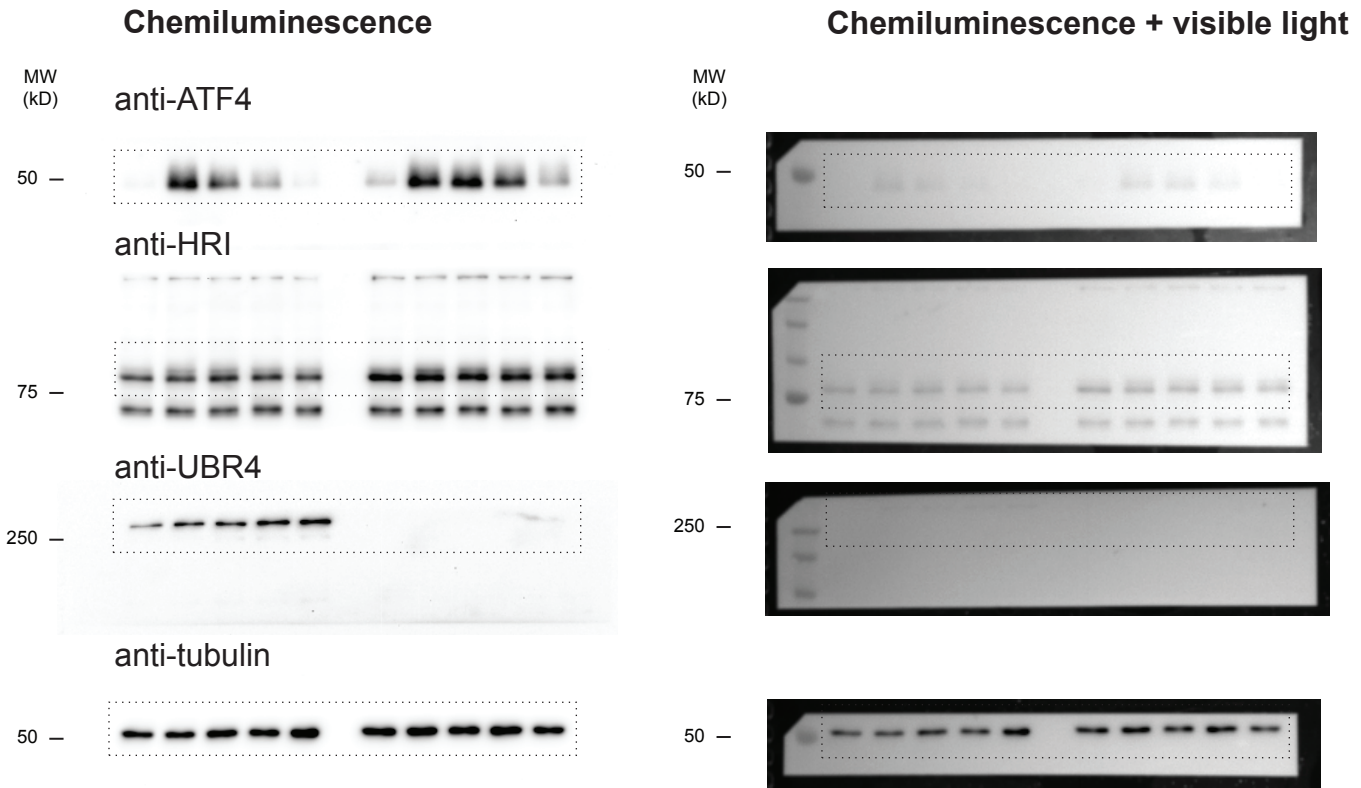

The loading control tubulin was run on the same gel as UBR4.

### Extended Data Figure 6b

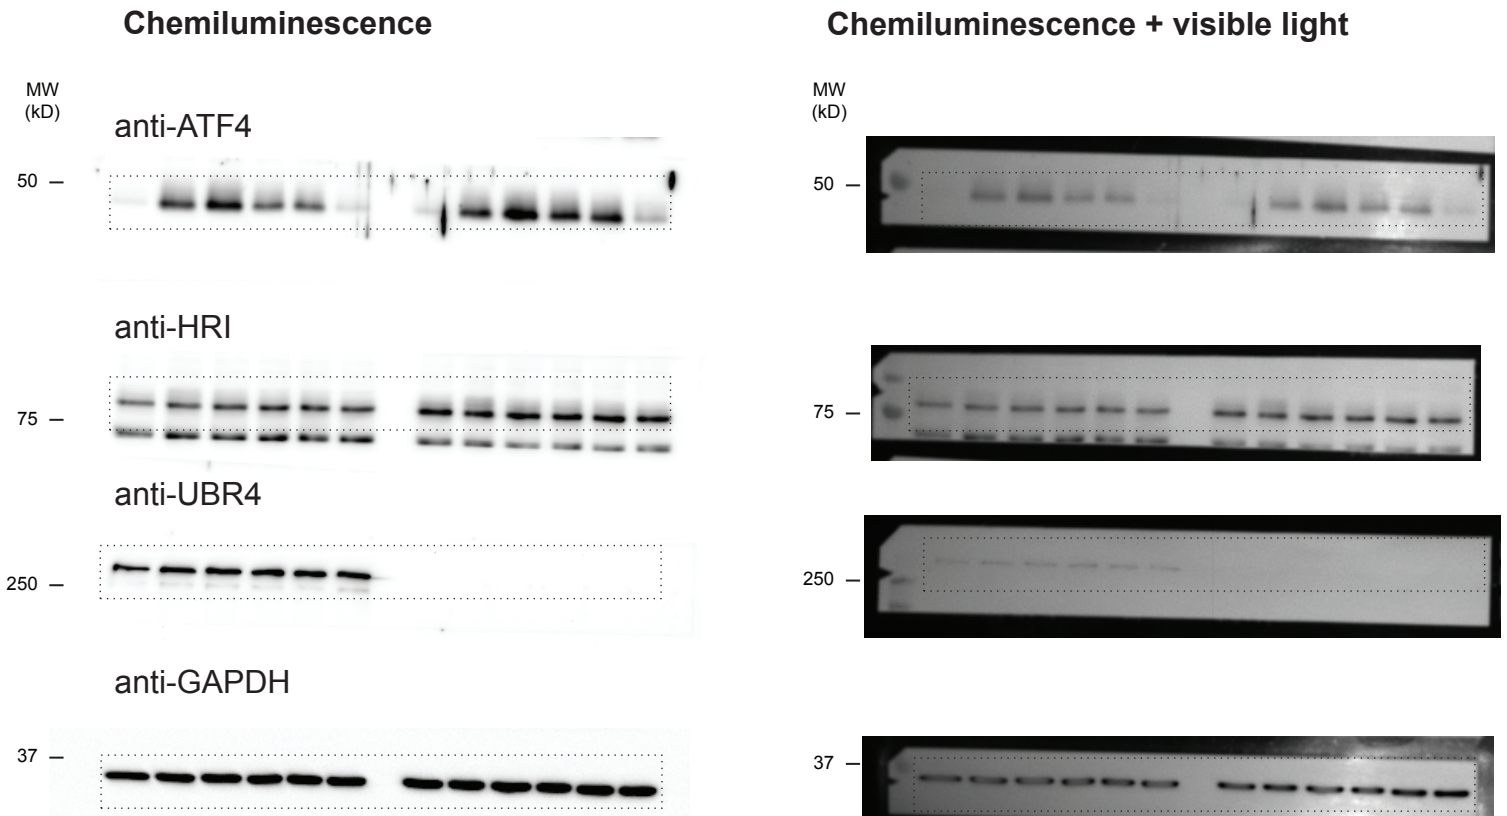

The loading control GAPDH was run on the same gel as ATF4, HRI and UBR4.

# Extended Figure 6c

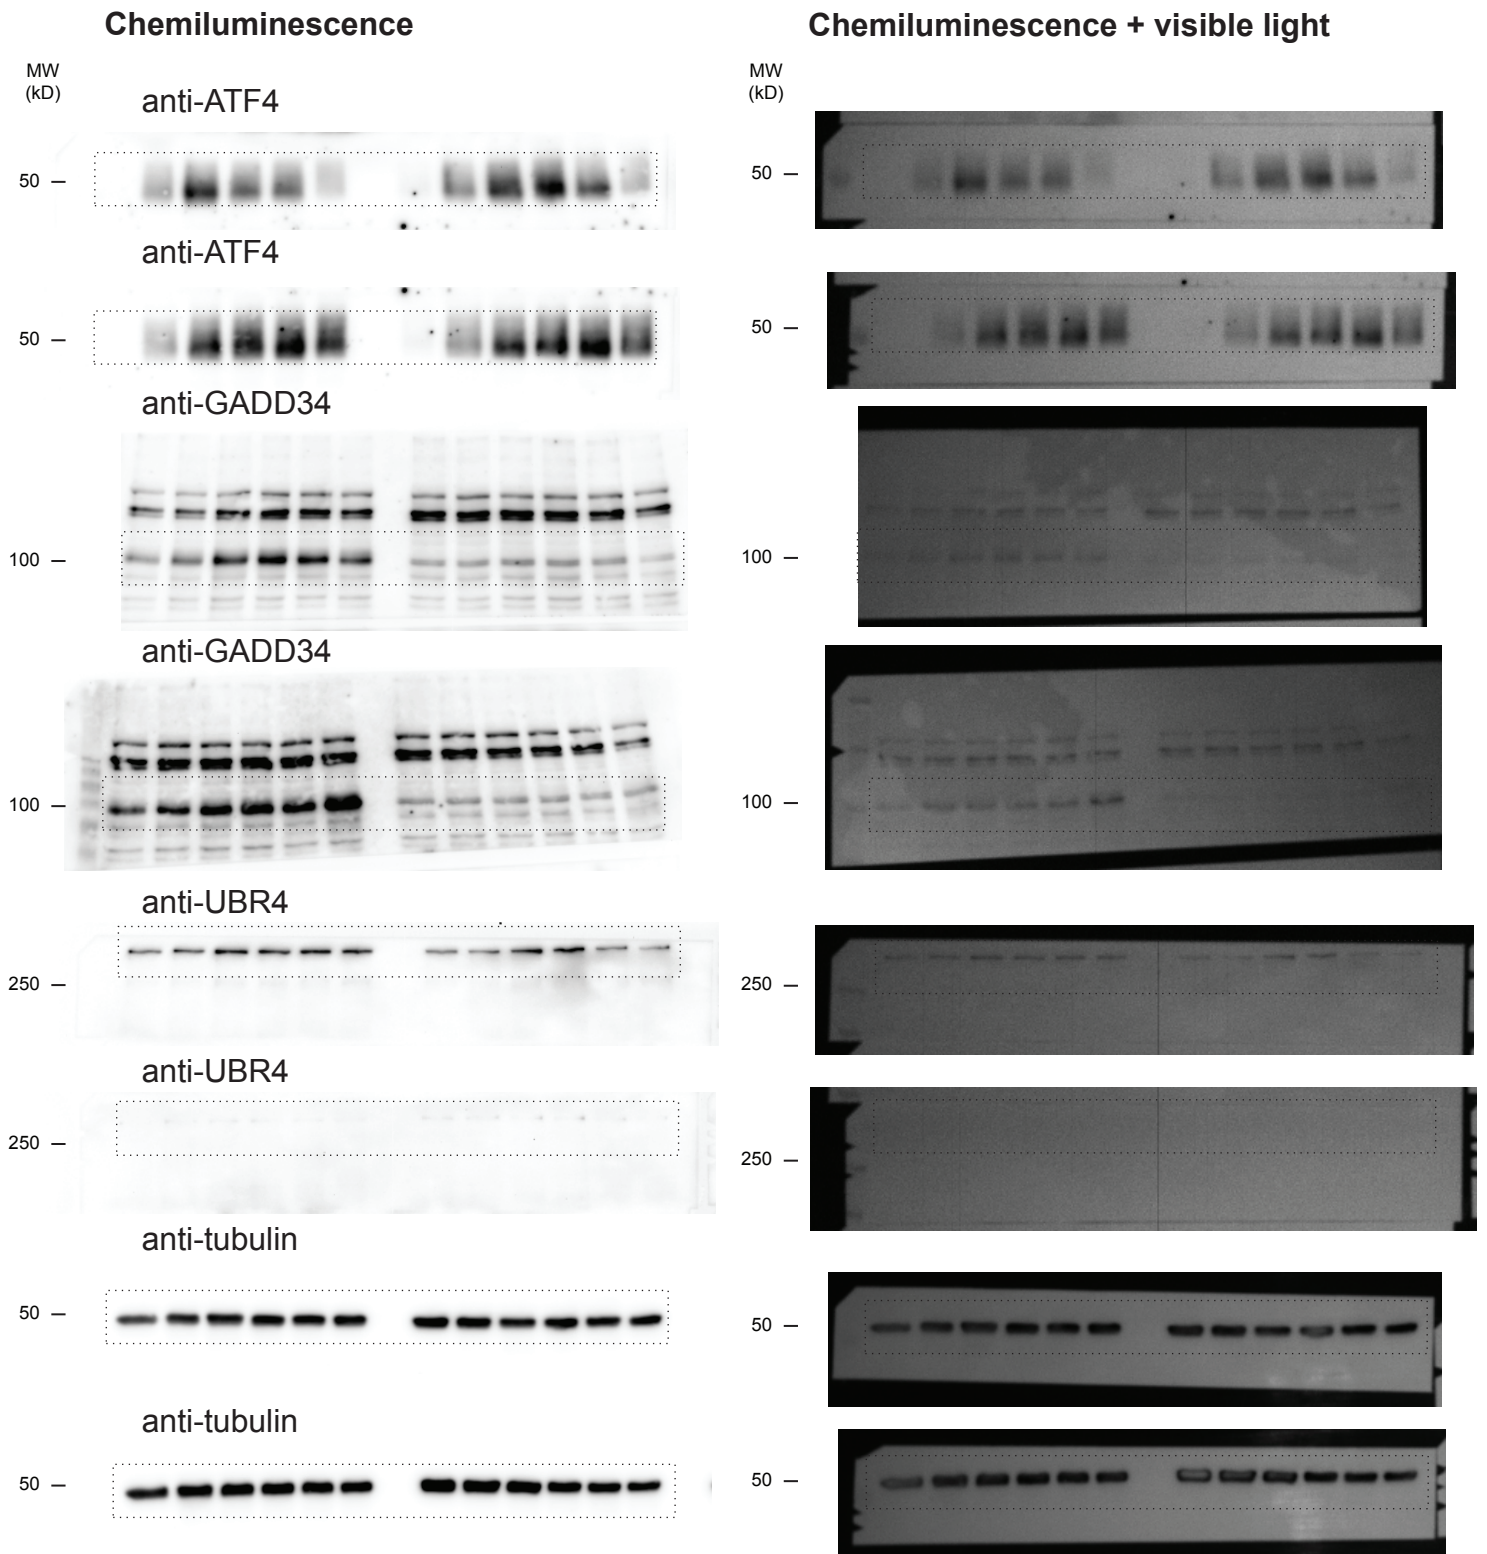

The loading controls tubulin were obtained by stripping the corresponding ATF4 membranes, which were run on the same gels as UBR4 in wt and  $\Delta UBR4$  respectively.

# Extended Data Figure 6d

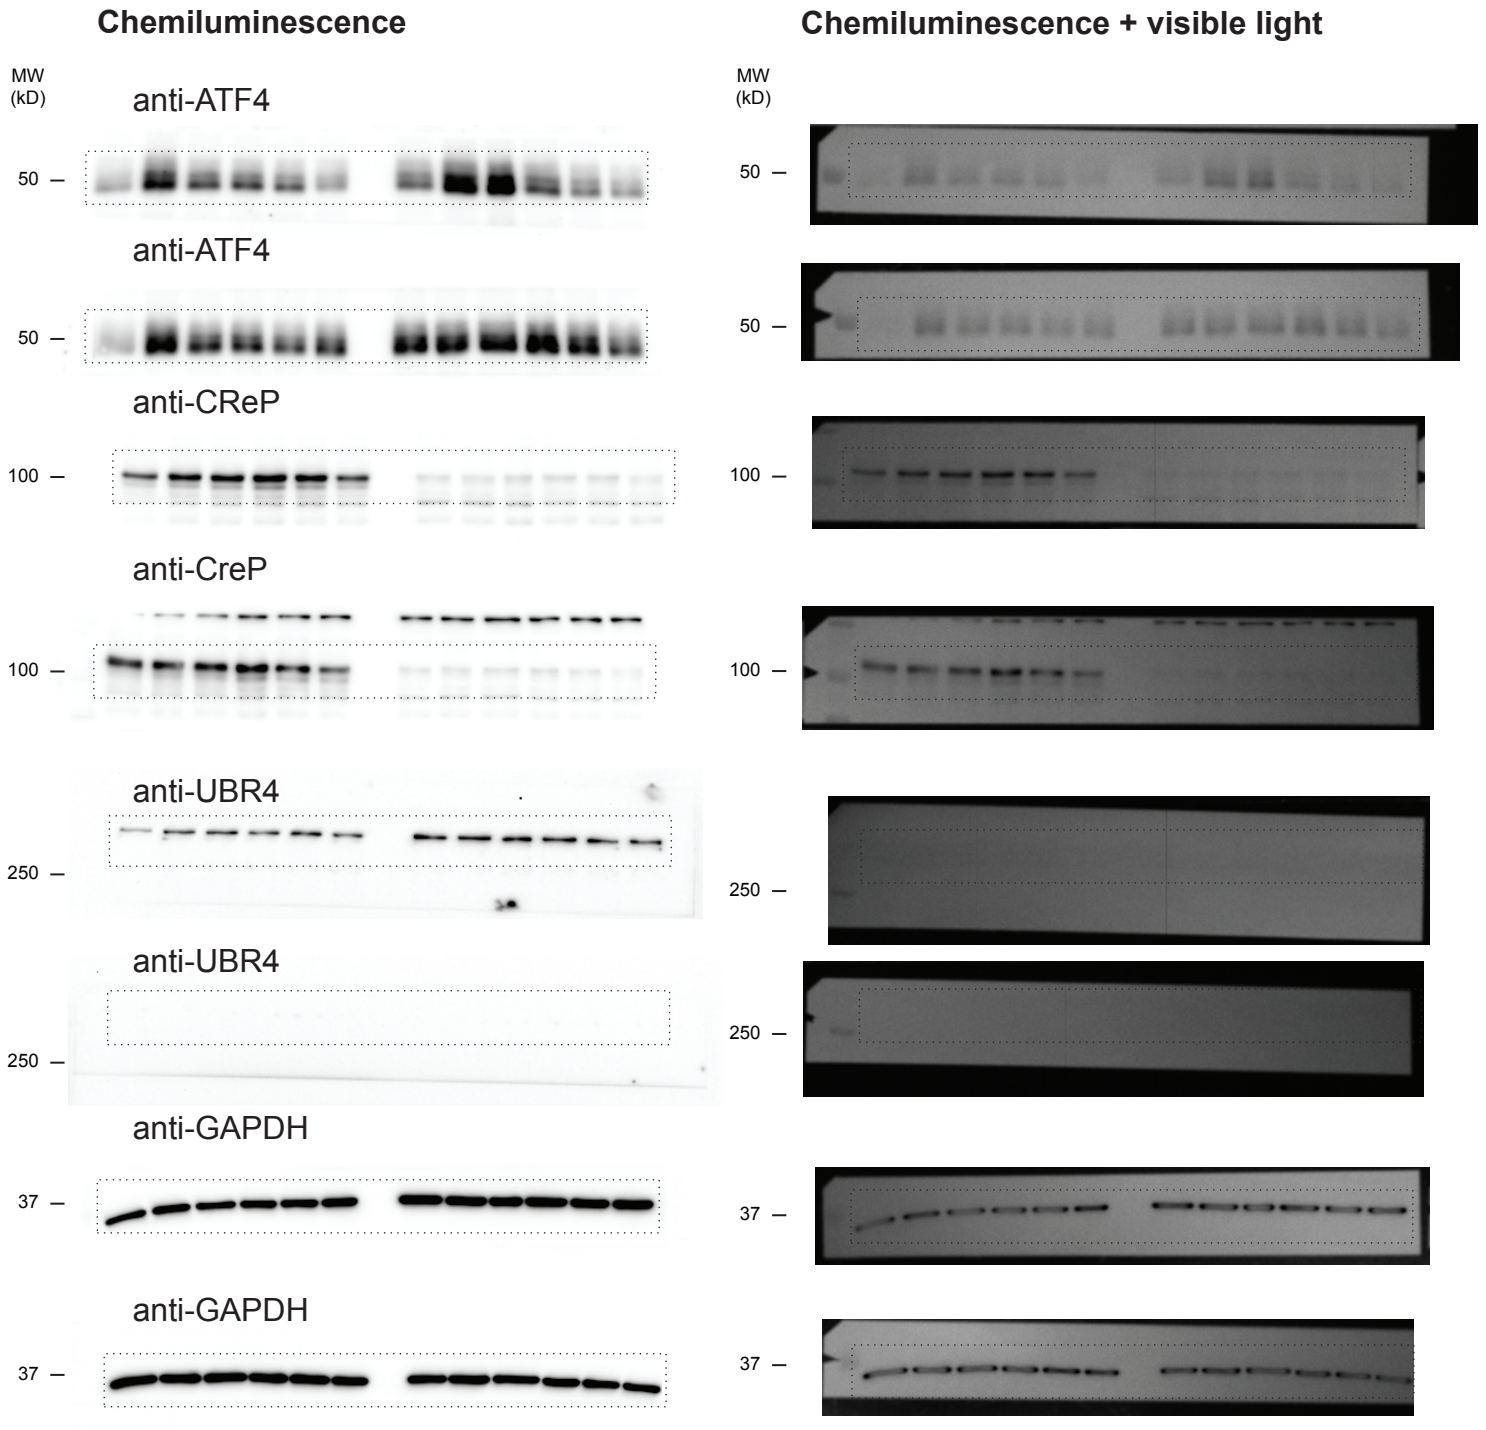

The loading controls GAPDH were run on the same gels as ATF4, CREP and UBR4 in wt and  $\Delta UBR4$  respectively.



# Extended Data Figure 6e

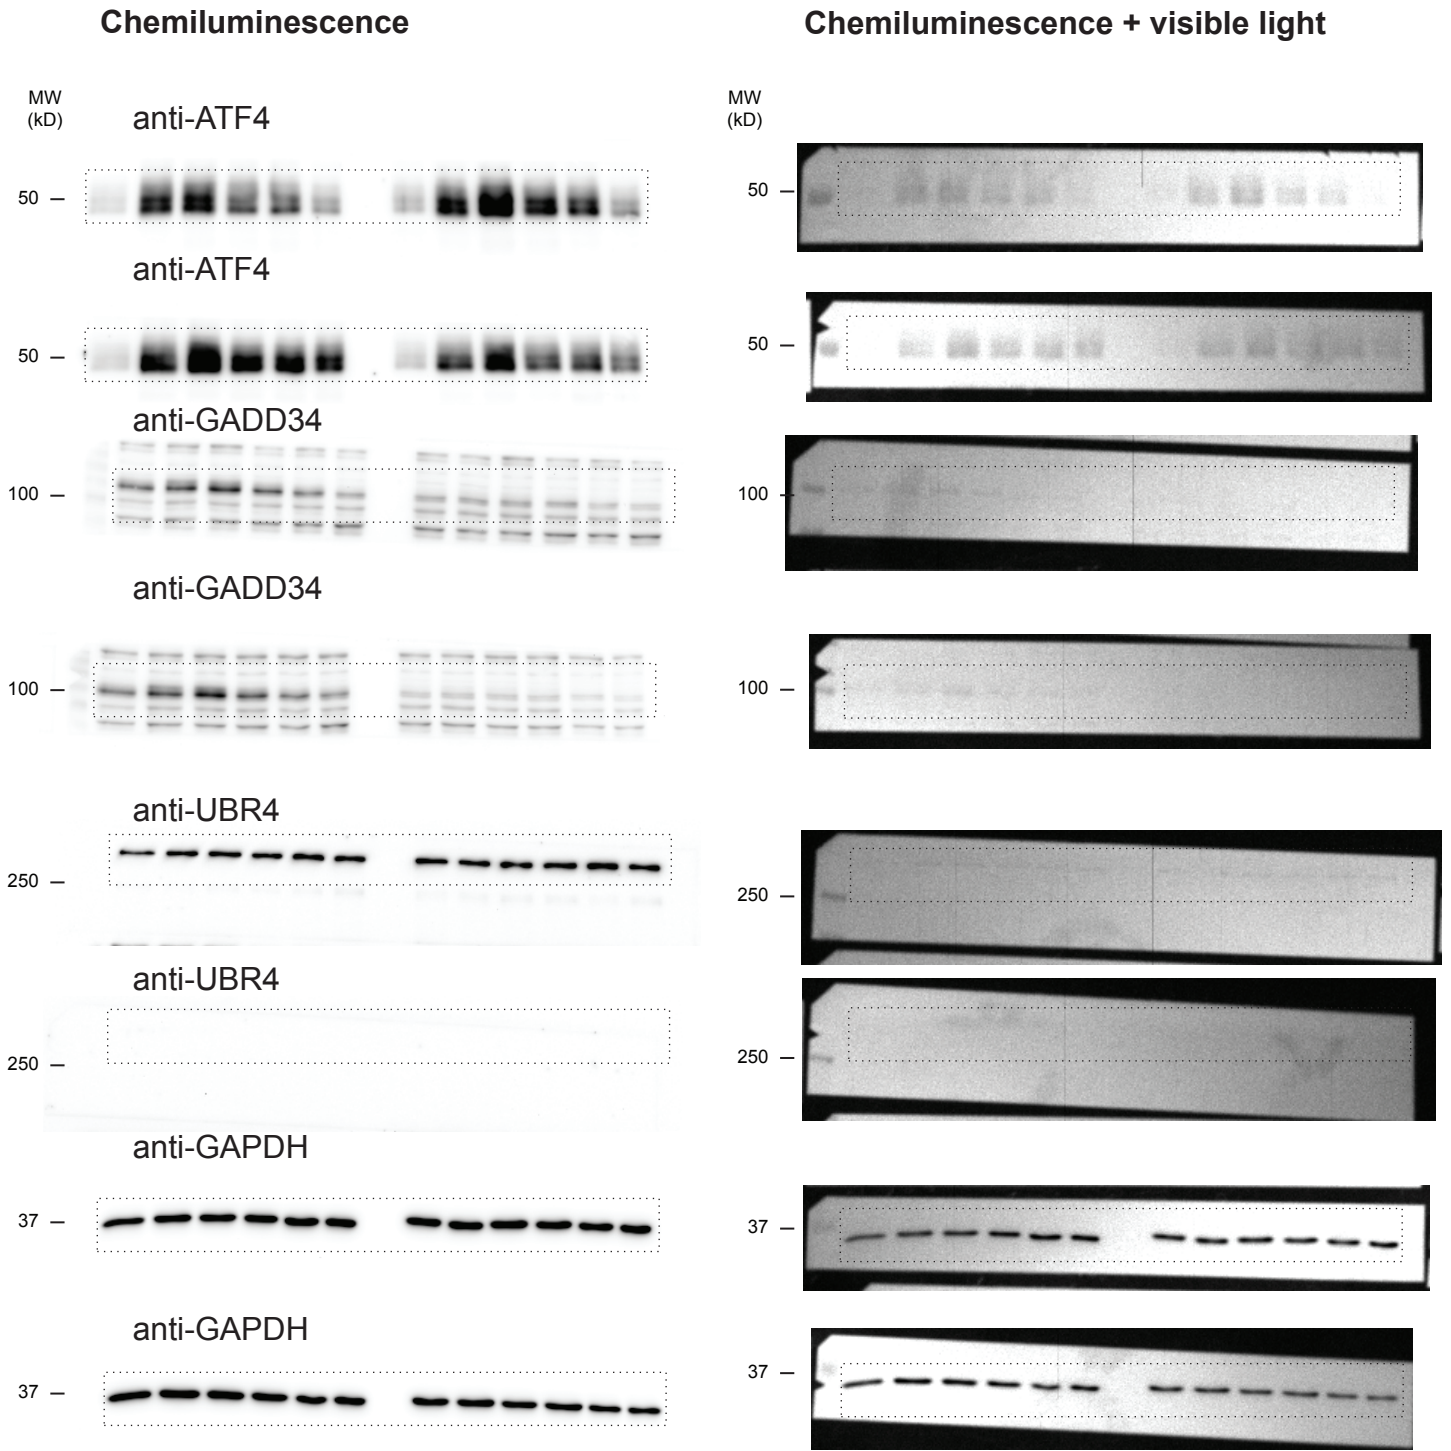

The loading controls GAPDH were run on the same gels as ATF4, GADD34 and UBR4 in wt and  $\Delta UBR4$  respectively.

**Extended Data Figure 7b**

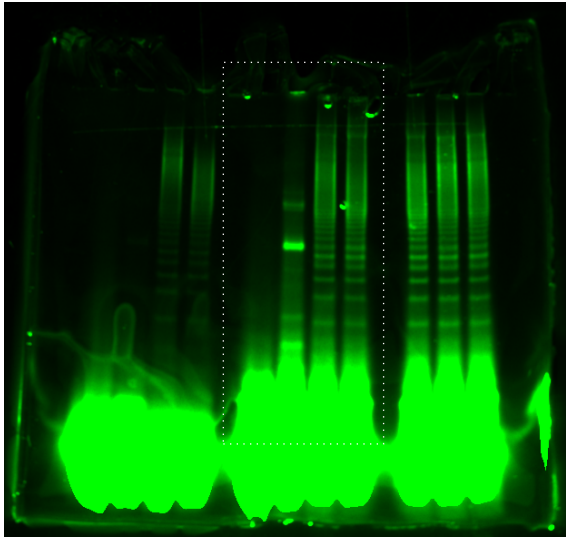

**Extended Data Figure 7c**  
Raw file

HRI-sumo autoradiography

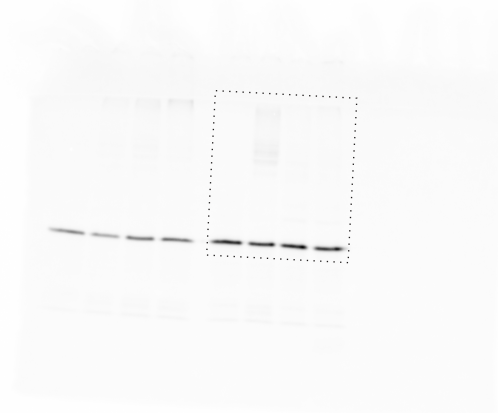

Contrasted raw file to discern typically low  $S^{35}$  autoradiography signal

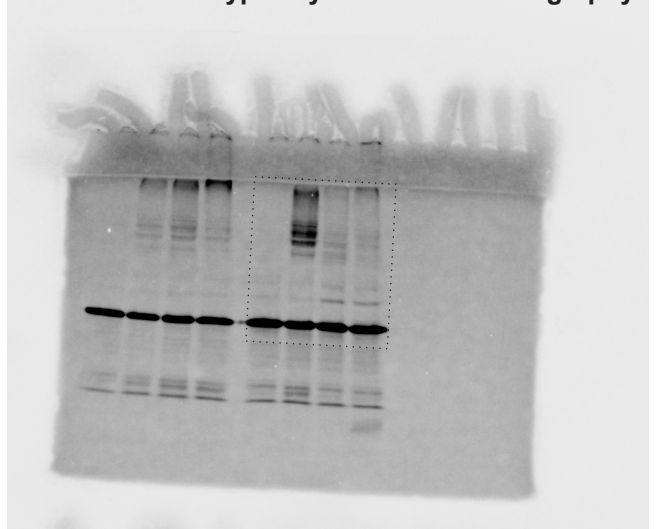

**Extended Data Figure 7f**

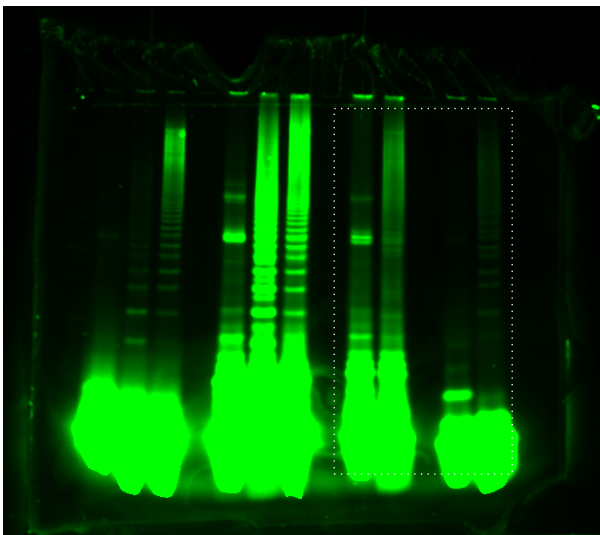

Extended Data Figure 8c

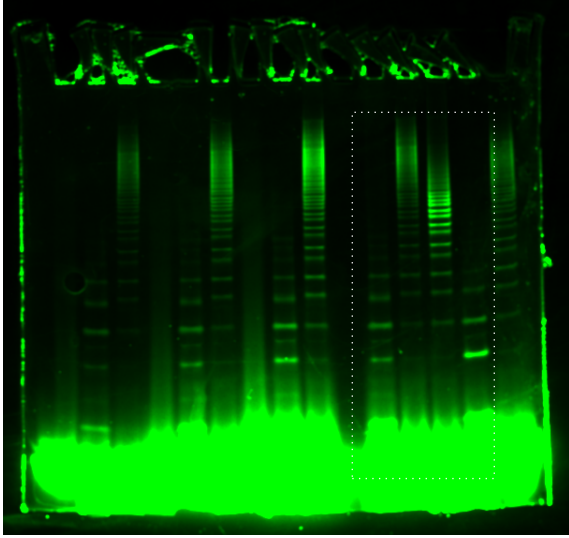

Extended Data Figure 8d

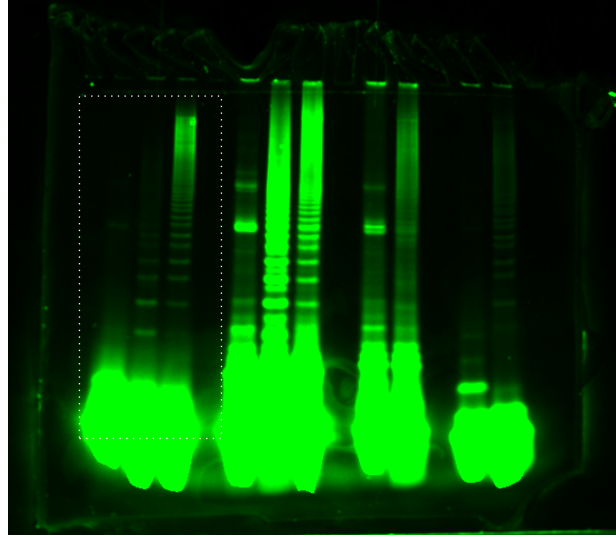

Extended Data Figure 8e

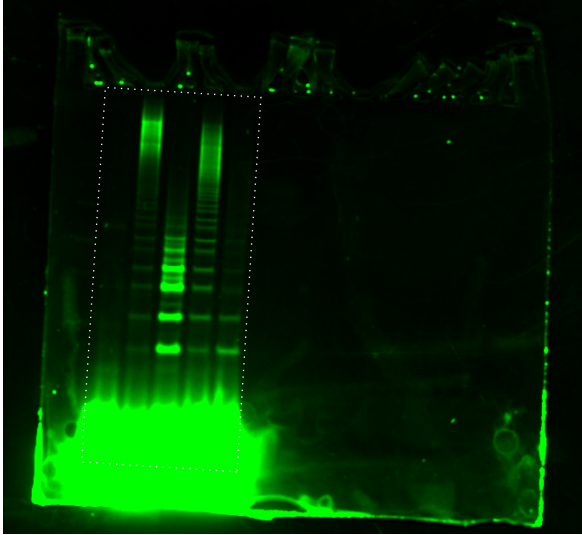

Extended Data Figure 8f

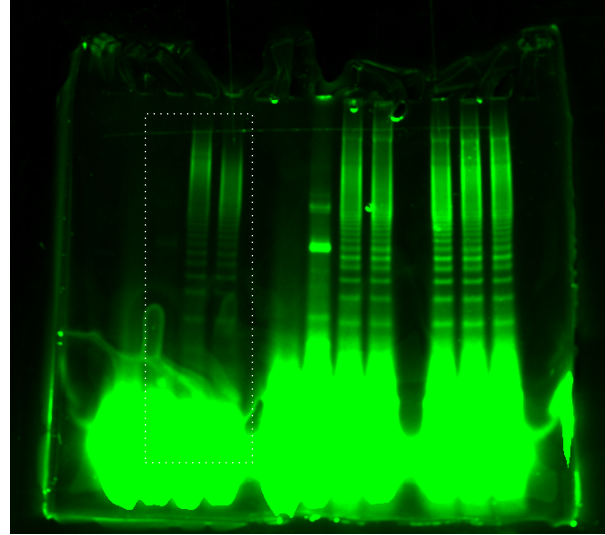

Extended Data Figure 8g

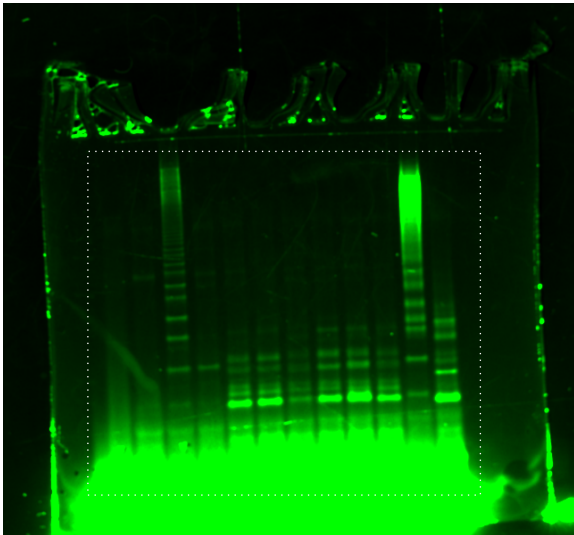

Extended Data Figure 8j

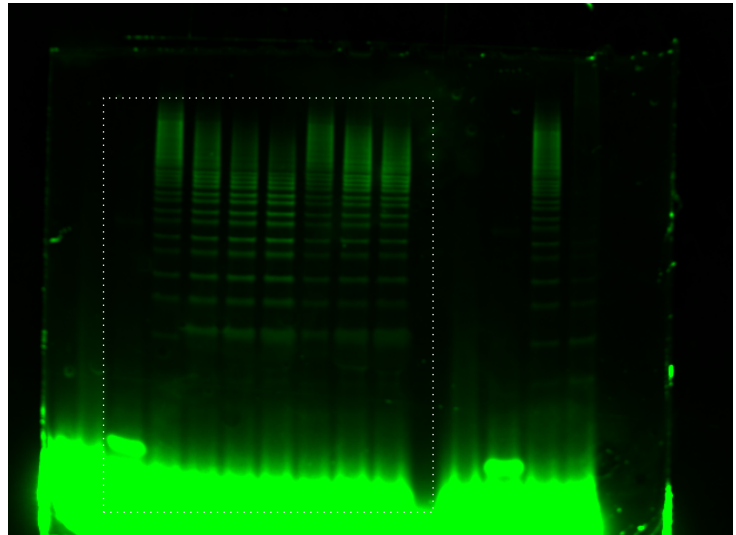

## Extended Data Figure 8k

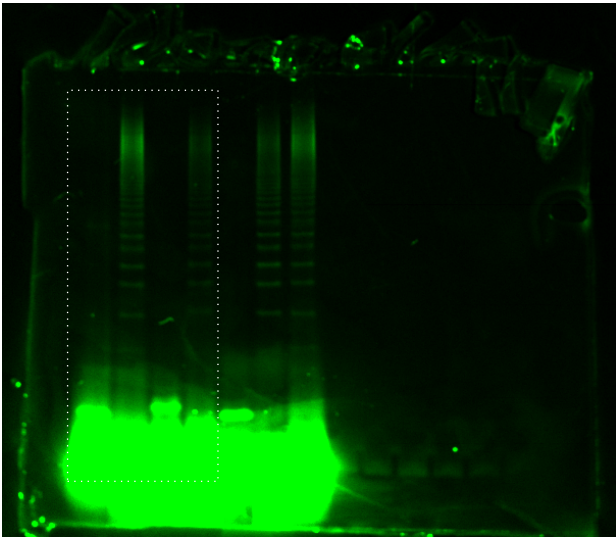

## Extended Data Figure 8l

### Chemiluminescence

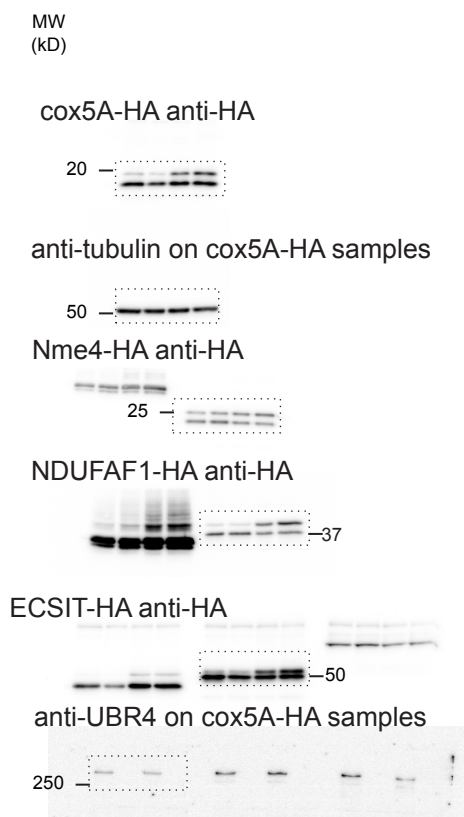

### Chemiluminescence + visible light

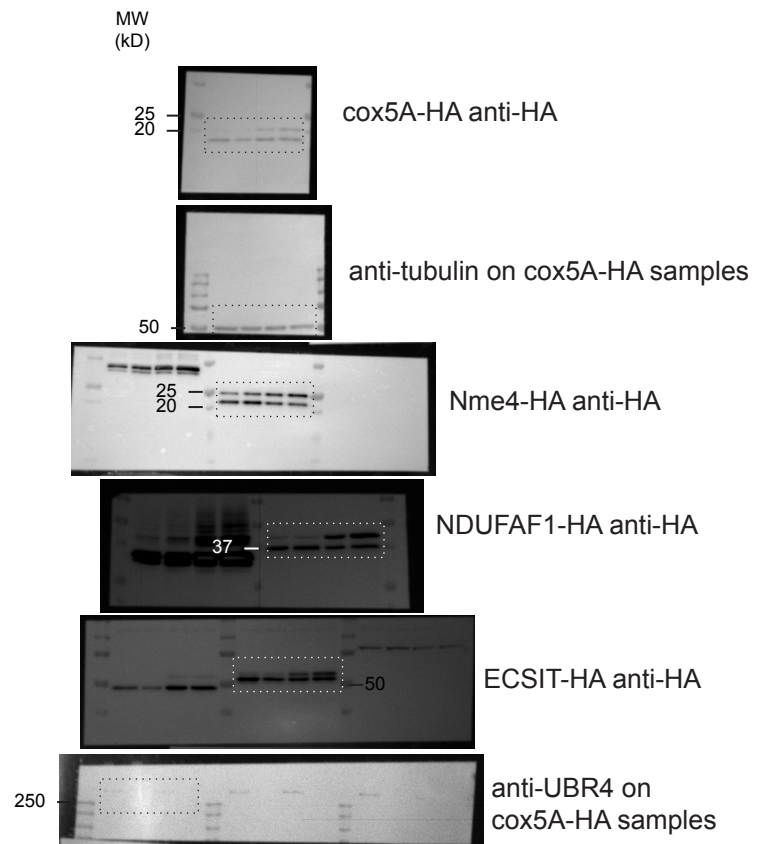

The loading control Tubulin was run on the same gel as cox5A-HA.

# Extended Data Figure 9a

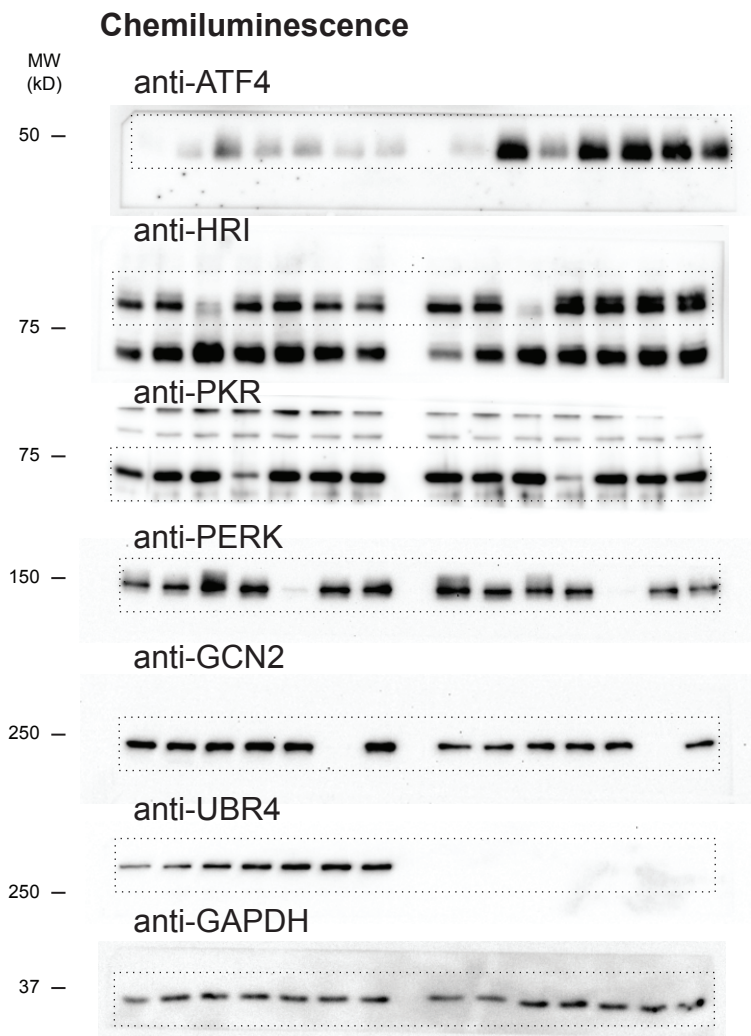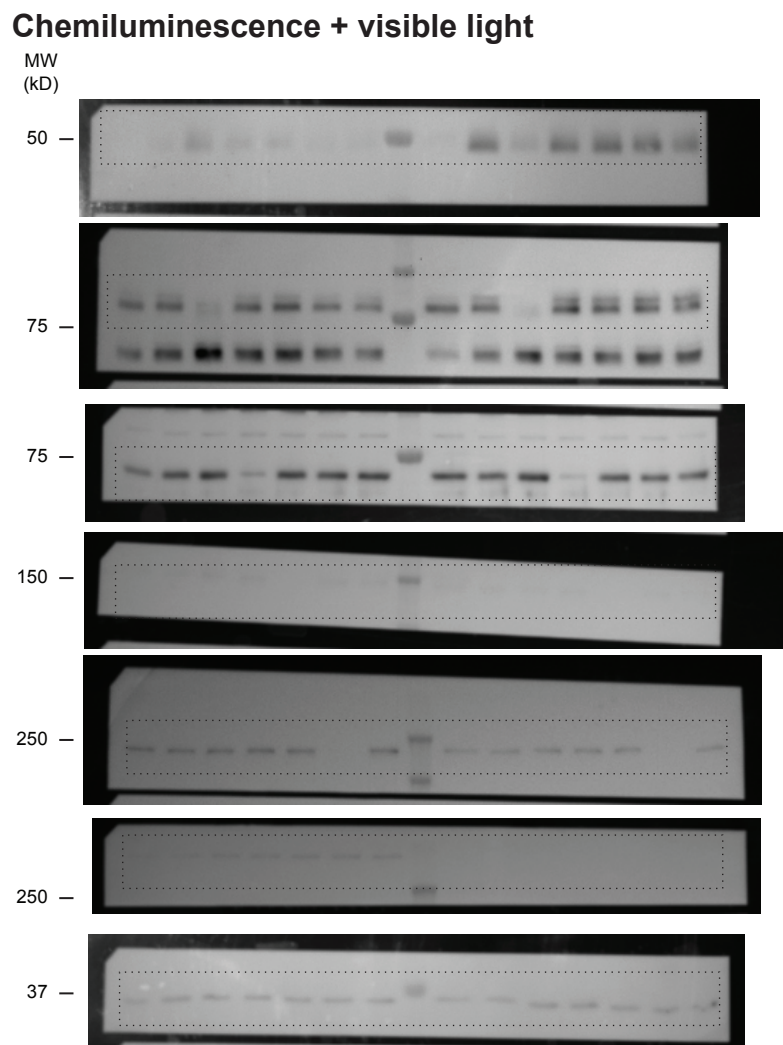

The loading control GAPDH was run on the same gel as PKR, PERK and UBR4.

# Extended Data Figure 9b

## Chemiluminescence

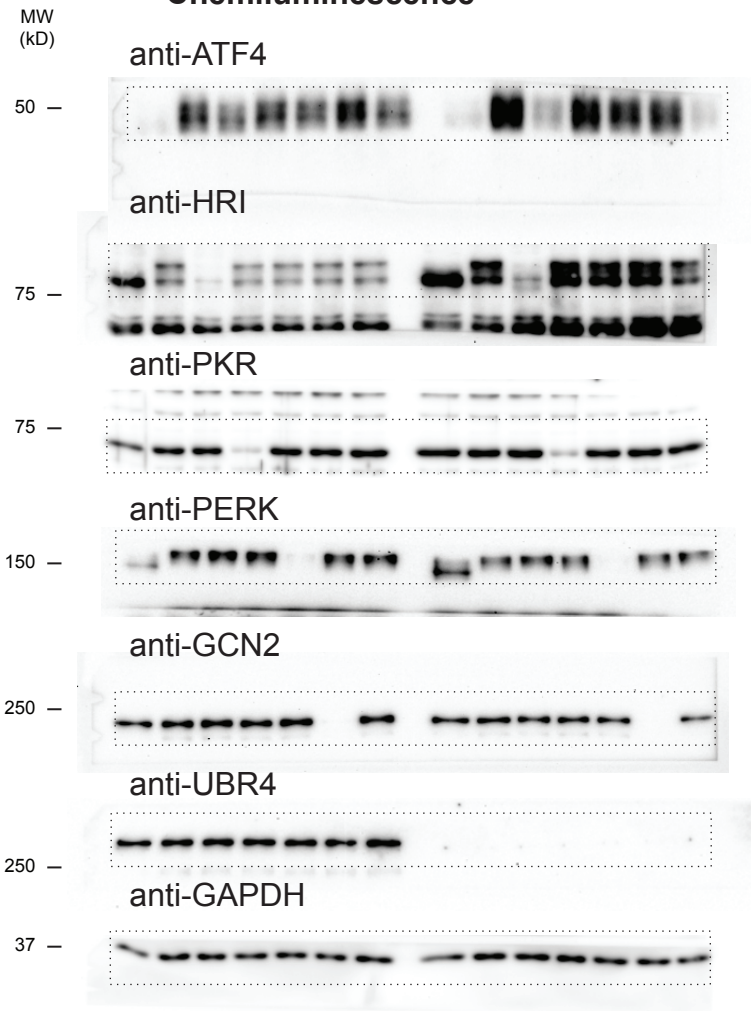

## Chemiluminescence + visible light

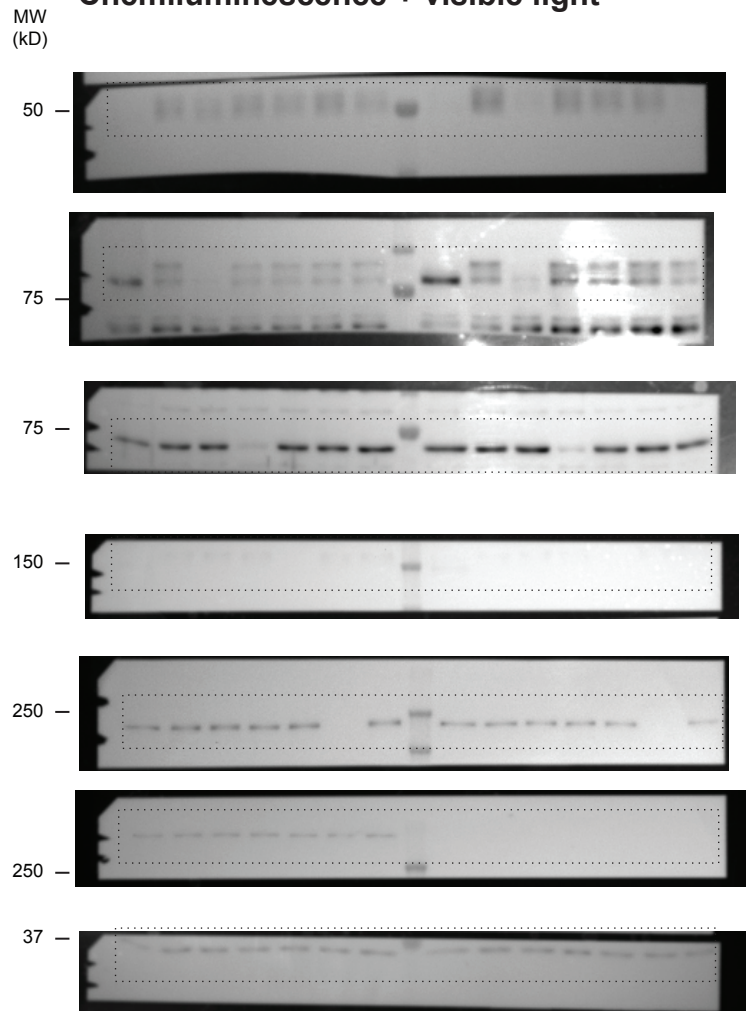

The loading control GAPDH was run on the same gel as PKR, PERK and UBR4.

# Extended Data Figure 9c

## Chemiluminescence

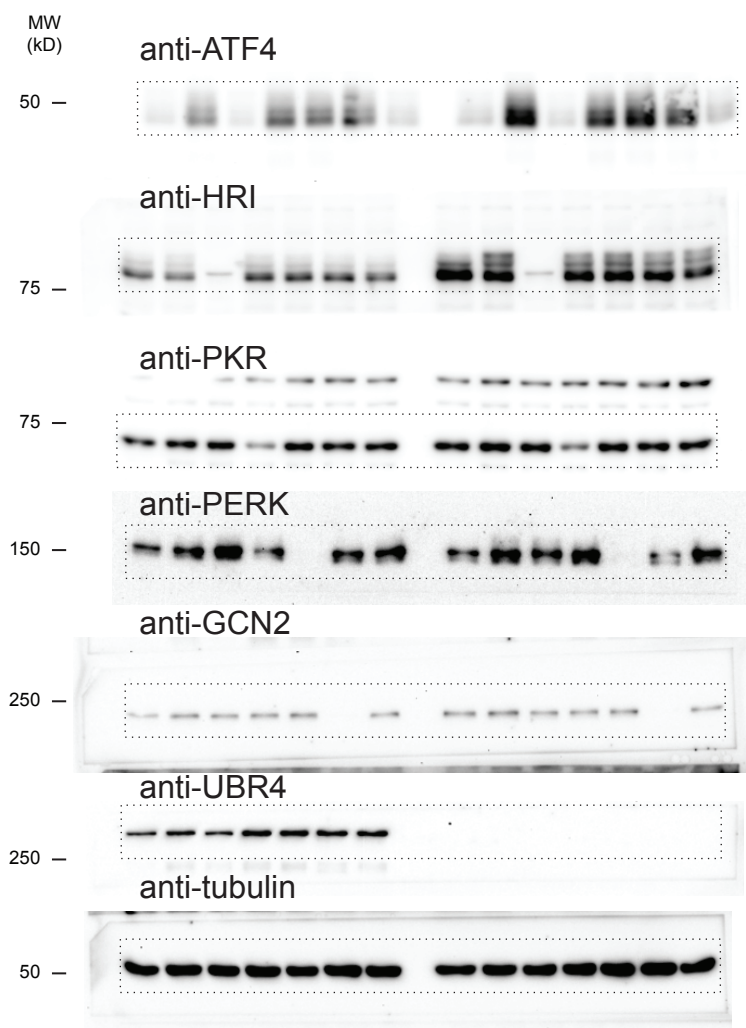

## Chemiluminescence + visible light

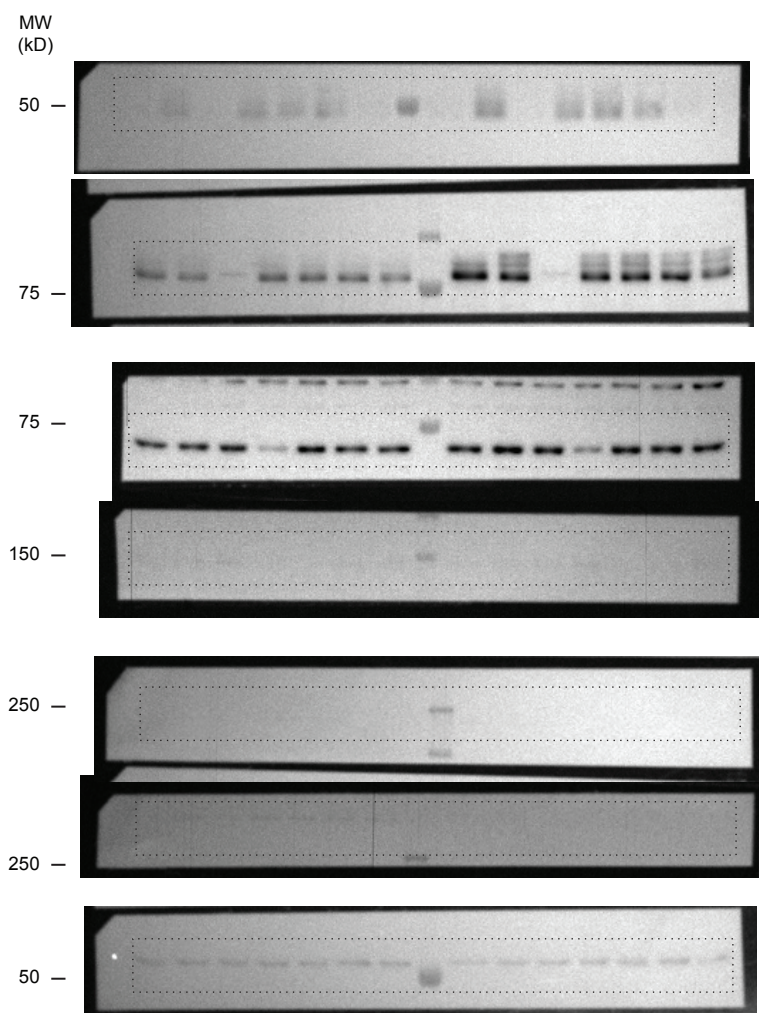

The loading control tubulin was run on the same gel as GCN2 and HRI.

# Extended Data Figure 9d

## Chemiluminescence

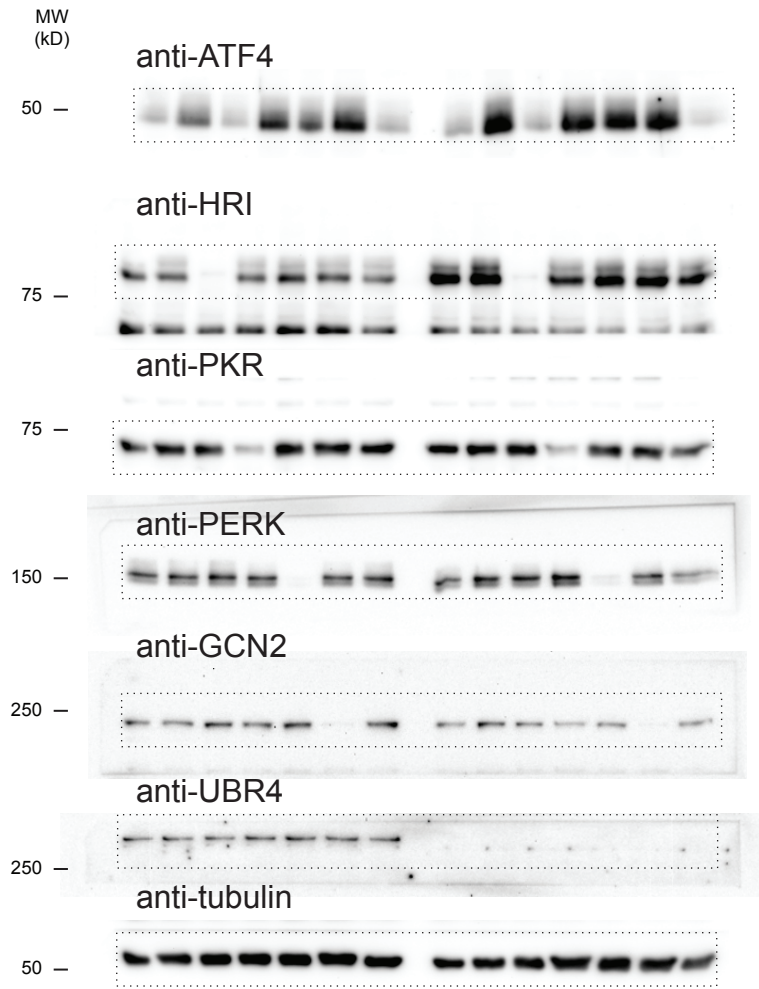

## Chemiluminescence + visible light

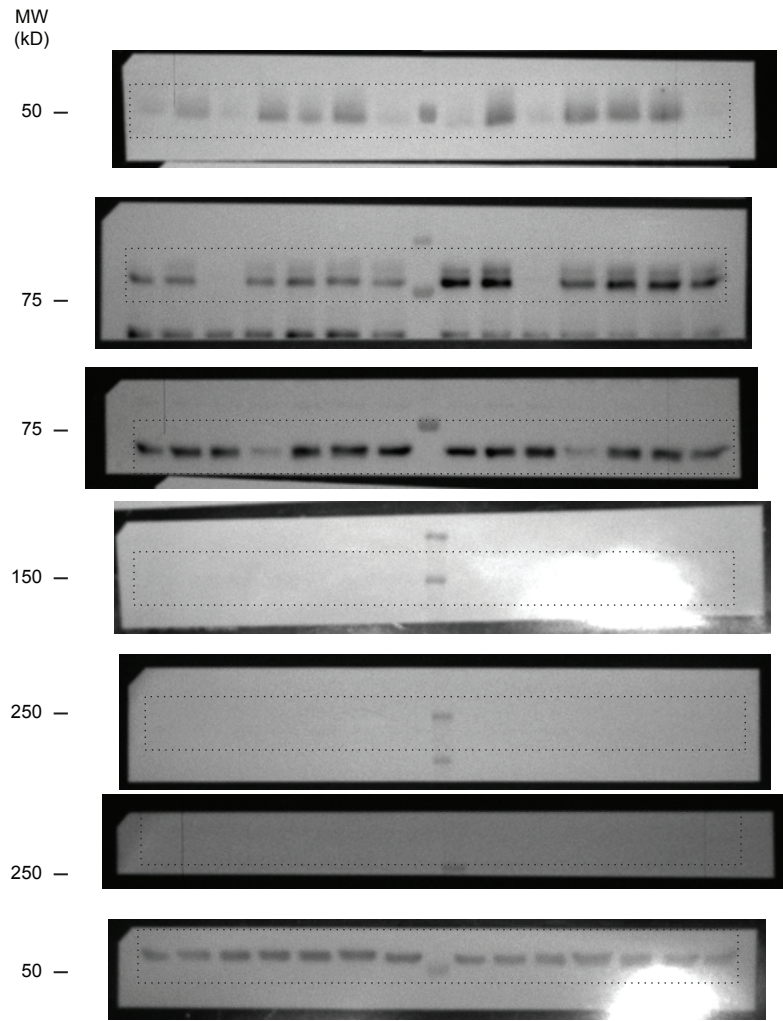

The loading control tubulin was run on the same gel as GCN2 and HRI.



### Extended Data Figure 10a

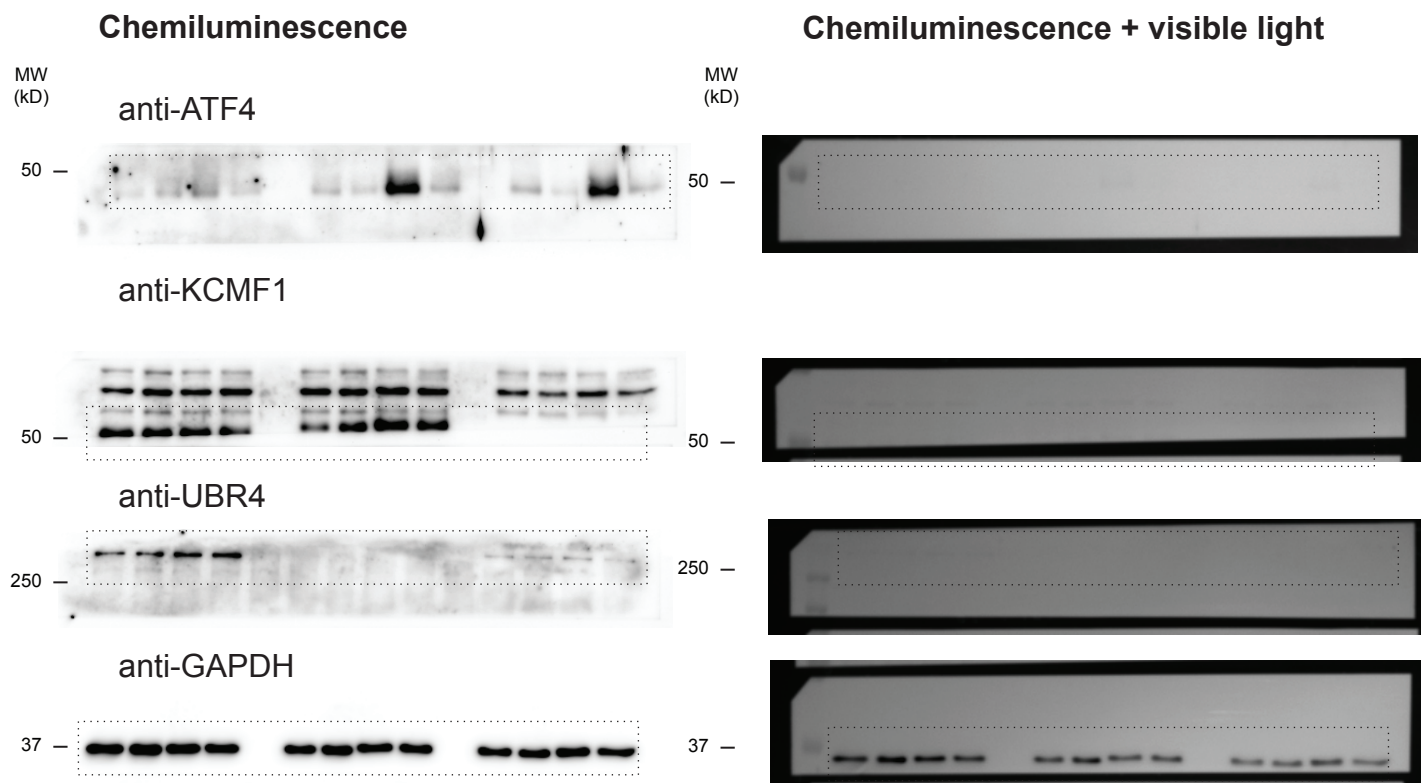

The loading control GAPDH was run on the same gel as UBR4 and KCMF1.

### Extended Data Figure 10b

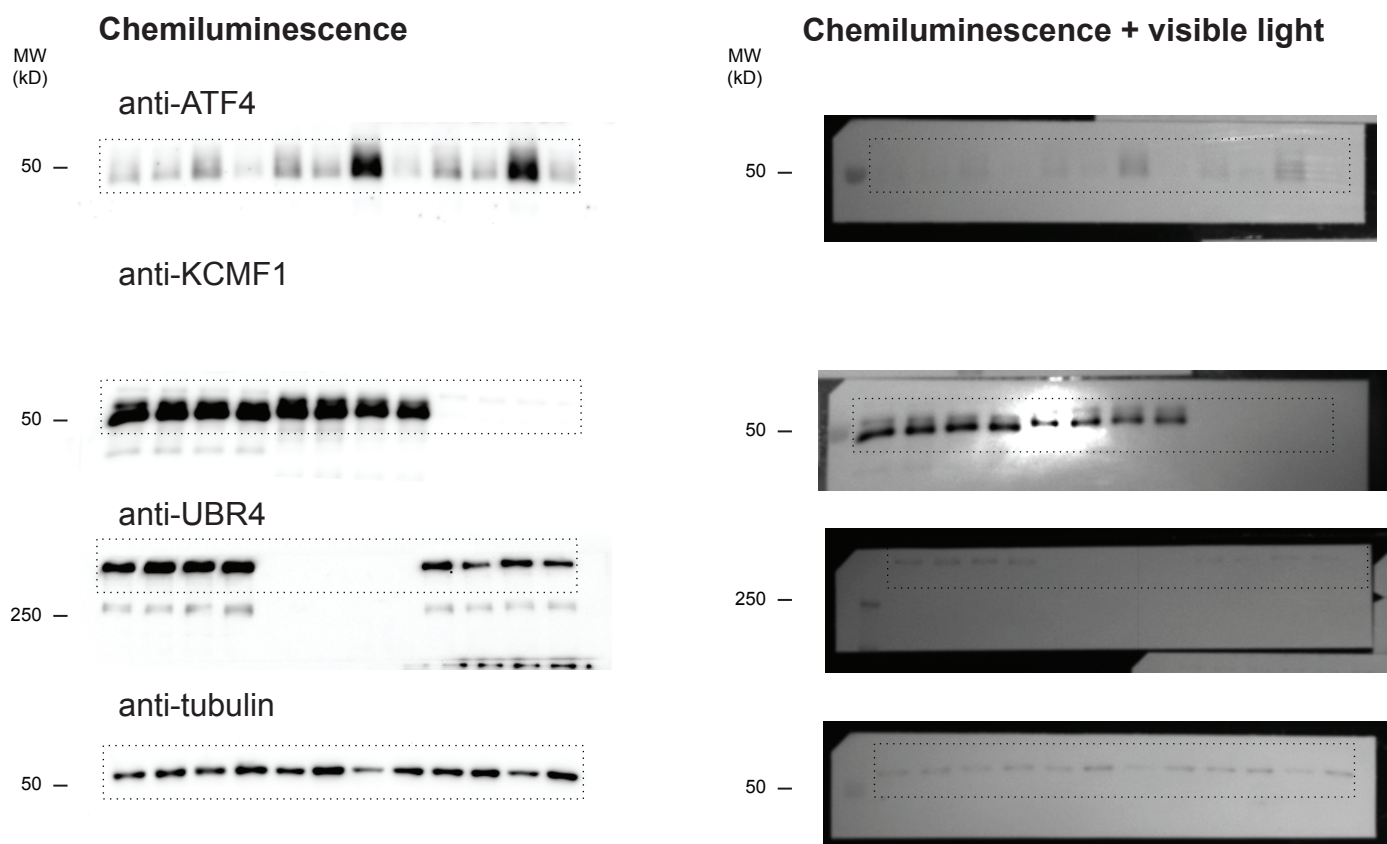

The loading control tubulin was obtained by stripping the ATF4 membrane, which was run on the same gel as UBR4.

### Extended Data Figure 10c

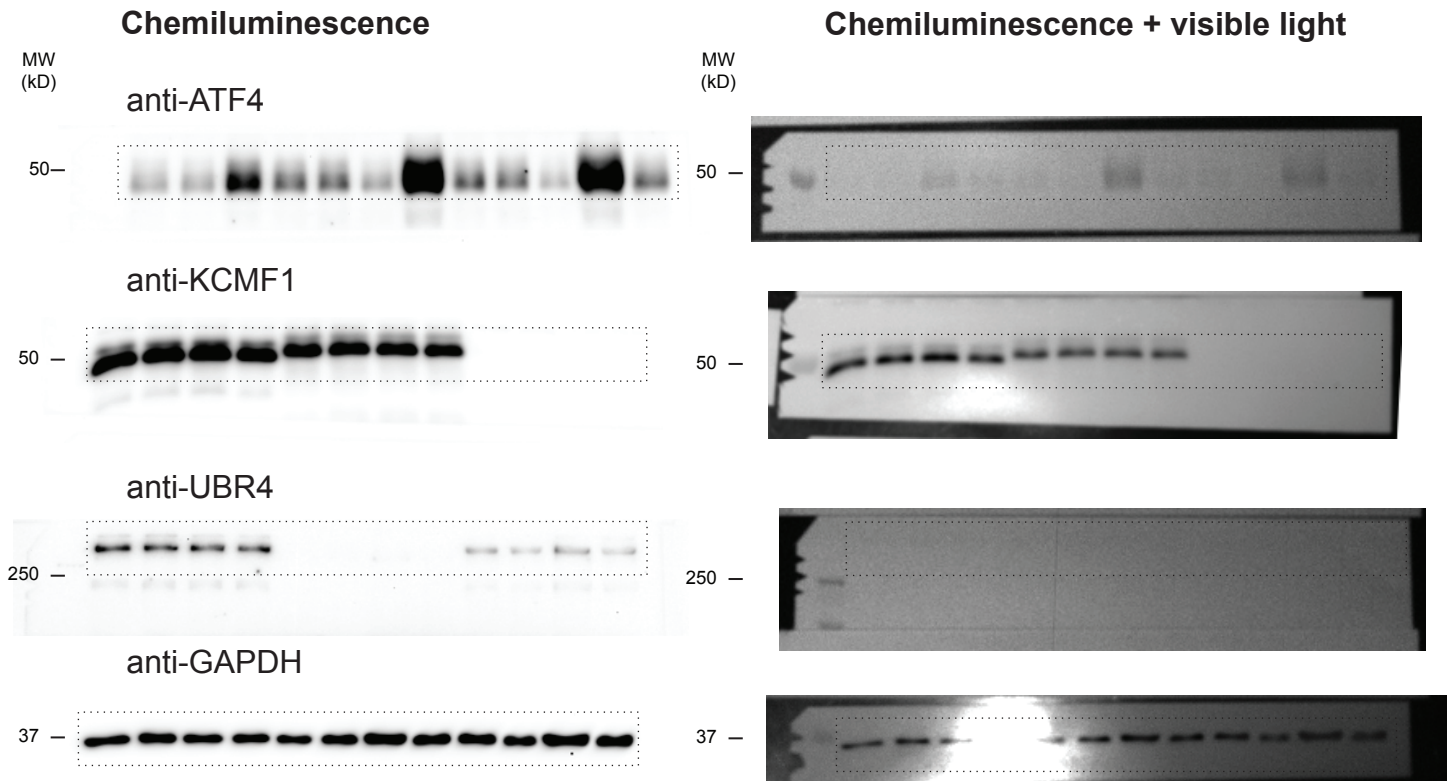

### Extended Data Figure 10e

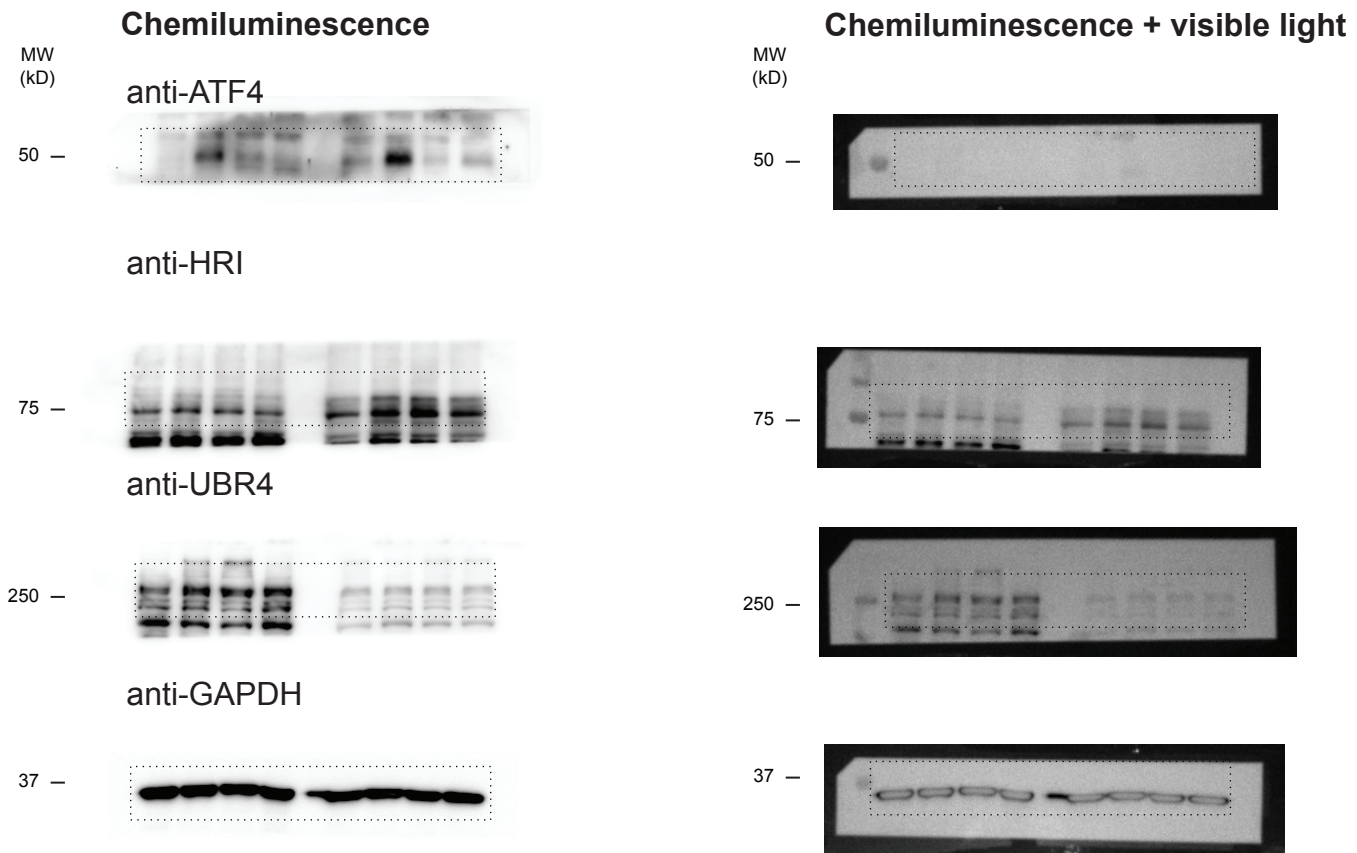

**a Gating strategy for cell competition assays:**

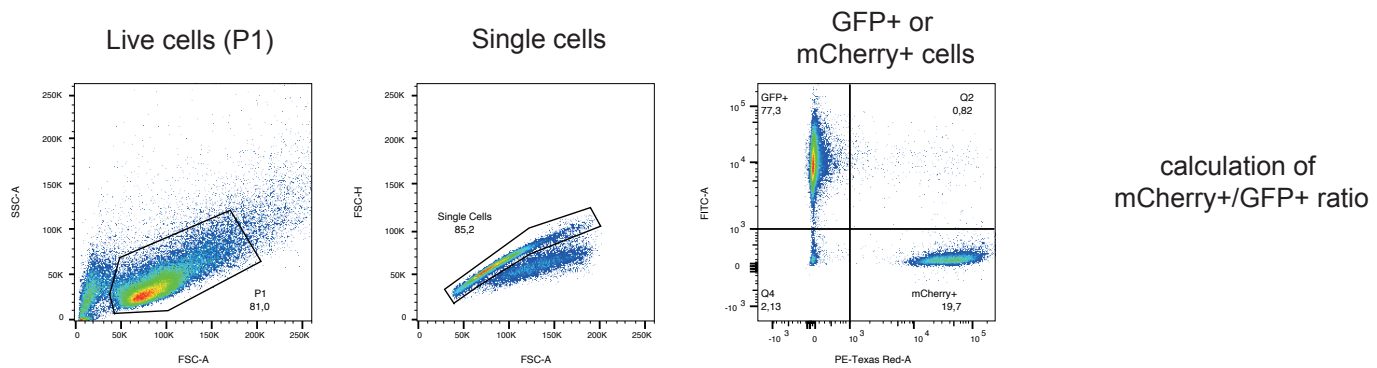

**b Gating strategy for protein stability reporter assays:**

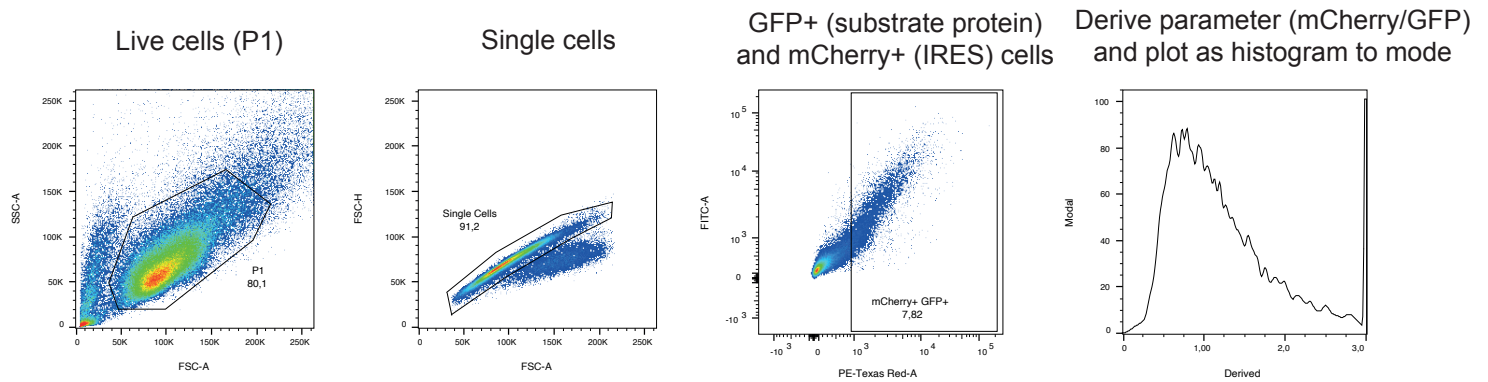

**c Gating strategy for mitochondrial protein import assays:**

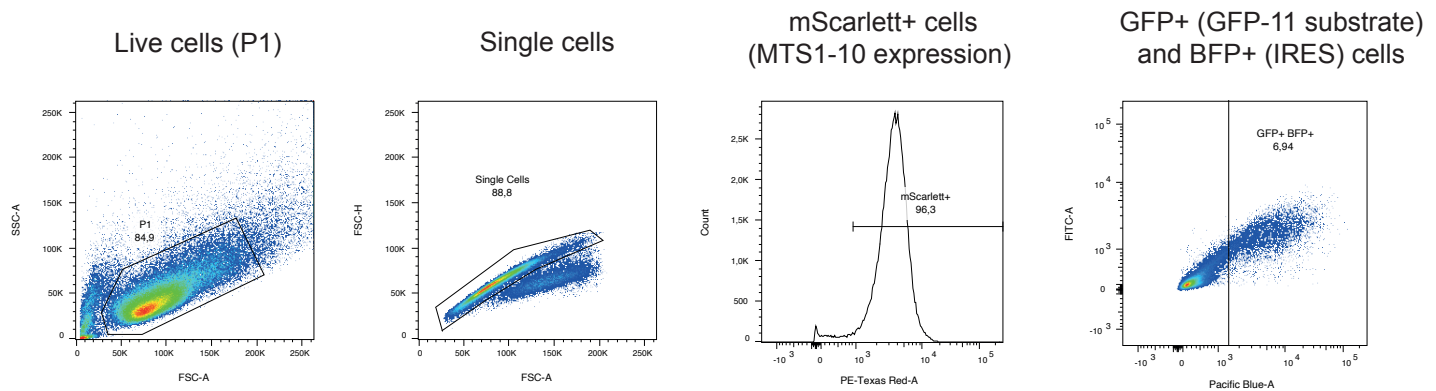

Derive parameter (GFP/BFP) and plot as histogram to mode

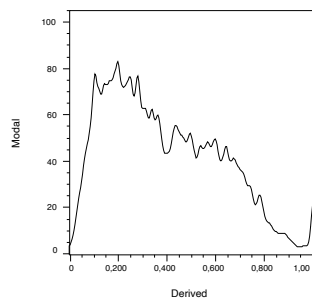

**Supplementary Figure 2. Gating strategy for flow cytometry experiments.** Representative plots shown for each type of flow cytometry analysis in this study. **a.** Gating strategy for cell competition assays as used in Fig. 1c, 1d, 1f, 5g, 5h and Extended Data Fig. 3e, 10f, 10g.

**b.** Gating strategy for protein stability reporter assays as used in Fig. 2b, 2c, 3a, 4a, 4c, 4f, 4j, 4k, 4l, 5a, 5e, 5f and Extended Data Fig. 3f, 3g, 3j, 3k, 4e, 5a, 5f, 5g, 6f, 6g, 7a, 7d, 7e, 7g, 8j, 8k, 8m, 8n, 8o, 8p.

**c.** Gating strategy for mitochondrial protein import assays as used in Fig. 2a, 5c and Extended Data Fig. 3a, 3b, 3c, 9e, 10d.
